1 **Planar cell polarity in the larval**  
2 **epidermis of *Drosophila* and the**  
3 **role of microtubules**

---

4  
5  
6 Stefano Pietra<sup>1</sup>, KangBo Ng<sup>1,2</sup>, Peter A. Lawrence<sup>1,3</sup>, José Casal<sup>1,3</sup>

7 <sup>1</sup> Department of Zoology, University of Cambridge, Downing Street, Cambridge CB2  
8 3EJ, United Kingdom

9 <sup>2</sup> Current Address: The Francis Crick Institute, 1 Midland Road, London NW1 1AT  
10 and Institute for the Physics of Living Systems, University College London, London,  
11 United Kingdom

12 <sup>3</sup> Authors for correspondence ([pal38@cam.ac.uk](mailto:pal38@cam.ac.uk), [jec85@cam.ac.uk](mailto:jec85@cam.ac.uk))

13

14 **Keywords:** Planar Cell Polarity, *Drosophila*, larval epidermis, microtubules,  
15 protocadherins, *dachsous*, *fat*, *ovo*, *dachs*

16

17 **ABSTRACT**

18 We investigate the mechanisms of planar cell polarity (PCP) in the *Drosophila* larva.  
19 The epidermis displays an intricate pattern of polarity and is excellent for the study of  
20 one system of PCP, the Dachsoos/Fat system; partly because the Starry Night/Frizzled  
21 system plays no discernable role in the larva. Measurements of the amount of  
22 Dachsoos reveal a peak near the rear of the anterior compartment. Localisation of  
23 Dachs and orientation of ectopic denticles reveal the polarity of every cell in the  
24 segment. We discuss how well these findings evidence our gradient model of  
25 Dachsoos activity. Several groups have proposed that Dachsoos and Fat fix the  
26 direction of PCP via oriented microtubules that transport PCP proteins to one side of  
27 the cell. We test this proposition in the larval cells and find that most microtubules  
28 grow perpendicularly to the axis of PCP. We find no meaningful bias in the polarity of  
29 those microtubules aligned close to that axis. We also reexamine published data from  
30 the pupal abdomen and fail to find evidence supporting the hypothesis that  
31 microtubular orientation draws the arrow of PCP.

32

## 33 INTRODUCTION

34 As cells construct embryos and organs they need access to vectorial information that  
35 informs them, for example, which way to migrate, divide, extend axons and orient  
36 protrusions such as hairs. This kind of polarity is known as planar cell polarity (PCP).  
37 In *Drosophila* there are (at least) two conserved genetic systems that generate PCP.  
38 Both systems rely on the formation of intercellular bridges made by transmembrane  
39 proteins containing cadherin repeats, these interact via their extracellular domains.  
40 The Dachous/Fat (Ds/Ft) system depends on heterodimers of the protocadherins Ds  
41 and Ft while the Starry Night/Frizzled system relies on homodimers of Starry Night  
42 (reviewed in [1-6]). Most developmental models can be tricky to study because both  
43 PCP systems operate at once and both have separate but confounding inputs into the  
44 orientation of bristles, etc. However, here we investigate the later stage larvae in which  
45 PCP depends entirely on the Ds/Ft system [7-9] whose mechanism is quite well  
46 understood. Ds molecules in one cell bind to Ft molecules in a neighbour cell to make  
47 intercellular bridges. Experiments argue that, using the disposition and orientation of  
48 Ds-Ft bridges, each cell compares the Ds activity of those two of its neighbours that lie  
49 in the relevant axis and points its denticles towards the neighbour with the *higher* Ds  
50 activity. Ds activity is thus an important component of the model: the activity of Ds in  
51 a cell defines its ability to bind to Ft in its neighbouring cell, that activity depending  
52 on at least three factors; the levels of Ds expression, the levels of Ft expression and the  
53 activity of Four-jointed (Fj). Fj is a Golgi-resident kinase that phosphorylates both Ds  
54 and Ft, reducing the activity of the former while increasing the activity of the latter  
55 [10-12].

56 The system has an additional property: because of the interdependence of  
57 membrane bound Ds and Ft in neighbouring cells, the polarity of one cell can affect  
58 the polarity of its neighbours and that polarity can be propagated to the next  
59 neighbour [7, 13, 14]. Thus, in these several ways the landscape of Ds activity in a field  
60 of cells is translated into the individual polarities of the cells (see [5] for further  
61 explanation). More recently, we have, via experiments and observations, developed a  
62 model that explains the quite complex pattern of denticle polarities in the larval  
63 abdominal segment [15].

## 64 **A model: the ventral epidermis of the *Drosophila* larva**

65 Each segment of the larva is divided by cell lineage into an anterior (A) and a posterior  
66 (P) compartment. In the adult abdomen, the A and P compartments are thought to be  
67 approximately coextensive with opposing gradients of Ds activity [16] and if such  
68 gradients were present in the larva then they could explain most of the denticle  
69 polarities. However, in the larva, in addition to the normal denticulated cells, there are  
70 three interspersed rows of muscle attachment cells [15, 17, 18] and our experiments  
71 suggest that two of these three rows have exceptionally low Ds activity which can  
72 affect the polarity of neighbouring cells (**figure 1**, [15, 17]). At this point we are not  
73 clear how much the final pattern is determined by pervasive gradients of Ds activity or  
74 how much by these local effects of the muscle attachment cells plus propagation.

75 One outstanding difficulty in applying present models to the whole segment is  
76 that more than half the cells do not make denticles and their polarities are not known.  
77 In this paper we have solved that difficulty by measuring the molecular polarities of  
78 these uncharted cells in two complementary and different ways and this allows us to  
79 extend model-building to the entire segment. With the same purpose we have also  
80 measured the amount of Ds expression in each intercellular junction across the entire  
81 segment.

82 Depending on the pattern of Ds activity, individual cells will acquire different  
83 numbers of Ds-Ft and Ft-Ds heterodimers at opposite cell faces. Generally this  
84 difference will explain the polarity of the whole cell, however, sometimes and  
85 depending on the disposition of neighbouring cells, two regions of a single cell can  
86 have opposing polarities [17]. To explain this phenomenon it has been argued that  
87 polarity of individual cells or parts of cells would depend on local “conduits” that run  
88 between opposing cell faces to mediate their comparison. In this paper we  
89 reinvestigate these multipolar cells in an experimental situation.

90 There is some evidence that suggests that these conduits acting within the Ds/Ft  
91 system could be microtubules and might polarise the cell by orienting the intracellular  
92 transport of molecules and vesicles [19, 20]. Indeed Harumoto et al reported that, in  
93 one particular region of the pupal wing, the majority of microtubules are aligned near-  
94 parallel with the axis and direction of PCP (the direction of PCP is defined by the

95 orientation of hairs) and, when growing, they show a small but statistically significant  
96 “bias” in polarity [20]. By bias we mean a net difference between the number of  
97 microtubules growing within a particular angle interval and the number of  
98 microtubules growing 180 degrees away; for instance we might see more microtubules  
99 growing distally, ie in the same direction as the hairs, than in the opposite direction.  
100 Harumoto et al therefore proposed that, in general, the Ds/Ft system controls the  
101 orientation of microtubules that would subsequently polarise cells by serving as  
102 oriented conduits in the polarised transport of PCP components [20]. Tests of this  
103 hypothesis in the adult abdomen have given mixed results [21-23]. Results from both  
104 wing and the abdomen are conflicting; regions of both appear to be polarised  
105 independently of the microtubules [23]. In the hope of clarifying this confusing  
106 situation we now report our studies of microtubule orientation *in vivo* in the larva.  
107 The larva has some advantages over imaginal discs or the adult abdomen: individually  
108 identifiable cells have a defined polarity and larval cells are much larger than the adult  
109 cells allowing more precision in plotting of the orientation of the microtubules.  
110 Several analyses of our own results on the larval abdomen and of raw data kindly  
111 provided by Axelrod from the pupal abdomen [22, 23] do not support the hypothesis  
112 that PCP is oriented by microtubules.

113 In this paper we add to our knowledge of PCP in the larval segment; our two  
114 most important findings are to define cell polarity in all the cells of the entire segment  
115 and to provide data arguing strongly that orientation of the microtubules does not  
116 correlate with the axis of denticle polarity.

## 117 MATERIALS AND METHODS

### 118 Mutations and Transgenes

119 Flies were reared at 25°C on standard food. The FlyBase [24] entries for the mutant  
120 alleles and transgenes used in this work are the following: *ds*: *ds*<sup>UA071</sup>; *en.Gal4*:

121 *Scer*\GAL4<sup>en-e16E</sup>; *sr.Gal4*: *sr*<sup>md710</sup>; *UAS.act::GFP*: *Dmel*\Act5C<sup>UAS.GFP</sup>; *UAS.DsRed*:

122 *Disc*\RFP<sup>UAS.cKa</sup>; *UAS.EB1::EGFP*: *Eb1*<sup>UAS.GFP</sup>; *UAS.ectoDs*: *ds*<sup>ecto.UAS</sup>;

123 *UAS.LifeAct::mCherry*: *Scer*\ABP140<sup>UAS.mCherry</sup>; *UAS.RedStinger*:

124 *Disc*\RFP<sup>DsRedT4.UAS.Tag:NLS(tra)</sup>; *UAS.ovo*: *ovo*<sup>svb.Scer</sup>\UAS; *act>stop>d::EGFP*: *d*<sup>FRT.Act5C.EGFP</sup>; *DE-*

125 *cad::tomato: shg<sup>KL.T:Disc\RFP-tdTomato</sup>; ds::EGFP: Avic\GFP<sup>ds-EGFP</sup>; hs.FLP: Scer\FLP1<sup>hs.PS</sup>;*  
126 *sqh.UTRN::GFP: Hsap\UTRN<sup>Scer\UAS.P\T.T:Avic\GFP-EGFP</sup>; tub>stop>Gal4:*  
127 *Scer\GAL4<sup>FRT.Rnor\Cd2.αTub84B</sup>.*

## 128 Experimental Genotypes

129 **(figure 1A)** *y w hs.FLP/ w; DE-cad::tomato/ en.Gal4 UAS.act::GFP.*

130 **(figure 1B)** *w; DE-cad::tomato sqh.UTRN::GFP.*

131 **(figure 2, and table 1)** *w; ds<sup>UA071</sup> DE-cad::tomato sqh.UTRN::GFP/ DE-cad::tomato*  
132 *sqh.UTRN::GFP; sr.Gal4/ UAS.ectoDs.*

133 **(figures 3, 4)** *w; ds::EGFP FRT40A.*

134 **(figures 5A,B, 6)** *y w hs.FLP/ w; en.Gal4 UAS.DsRed/ +; act>stop>d::EGFP/ +.*

135 **(figures 5C,D, S2, 6)** *y w hs.FLP/ w; DE-cad::tomato; act>stop>d::EGFP/ +.*

136 **(figures 7, S3)** *y w hs.FLP/ w; tub>stop>Gal4/ DE-cad::tomato; UAS.ovo/*  
137 *UAS.EB1::EGFP.*

138 **(figures 8, S4, S6, and movies 1, 2)** *y w hs.FLP/ w; tub>stop>Gal4/ DE-cad::tomato;*  
139 *UAS.EB1::EGFP/ UAS.LifeAct::mCherry.*

140 **(figure S1)** *w; ds::EGFP FRT40A/ +; UAS.ectoDs/ sr.Gal4 UAS.RedStinger.*

## 141 Live Imaging of Larvae

142 To induce clones expressing *d::EGFP*, *ovo*, or *EB1::EGFP*, 2-4 h AEL embryos were  
143 heat shocked on agar plates with fresh yeast paste at 33°C for 30 min in a water bath.  
144 Larvae were grown at 25°C for 47-52 hr and moved to fresh standard food for 2-4 h  
145 (tagged Ds, D, and EB1) or 10-15 hr (predenticles) before imaging. Second stage  
146 larvae were washed in water and then immobilised between a glass slide and coverslip  
147 by exploiting the surface tension of a drop of Voltalef 10S oil or water. Epidermal cells  
148 in the A4-A7 abdominal segments of the larvae were imaged live through the cuticle  
149 using a Leica SP5 inverted confocal microscope with a 63x/1.4 oil immersion  
150 objective. Tagged fluorescent proteins were excited sequentially with 488nm and  
151 561nm laser beams and detected with 510-540nm and 580-630nm emission filters,  
152 using Leica HyD hybrid detectors.

## 153 **Quantification of Ds Amounts at Cellular Interfaces**

154 Ds::EGFP membrane distribution was analysed in the apical plane of ventral  
155 epidermal cells of early second stage larvae. Two juxtaposed areas of the segment (the  
156 denticulate and undenticulate regions) were imaged separately to grant sufficient  
157 resolution and subsequently merged, and maximum intensity projections of typically  
158 4 $\mu$ m stacks were used to compensate for ruggedness in the denticulate region.  
159 Between 3 and 12 images from different larvae were acquired and aligned to the  
160 mediolateral axis using rows of tendon cells as reference. Ten straight lines parallel to  
161 the anteroposterior axis and 4 $\mu$ m wide were drawn over the images at random heights,  
162 and the profile of average fluorescence intensity along each line was plotted. Each  
163 profile displayed peaks where the line intersected cell boundaries: the fluorescence  
164 maxima were quantified using the BAR collection of ImageJ routines [25] and  
165 manually assigned to the respective cellular interfaces. Due to cell morphology and  
166 image noise not every line could provide a measure for each interface, therefore for  
167 every image a value of mean intensity was calculated only for cell boundaries  
168 intersected by at least 3 lines. The mean of means of all boundaries in an image was  
169 used as reference to normalise the fluorescence intensity maxima.

## 170 **Mapping of D polarity**

171 D polarity at the plasma membrane was assessed over the whole segment by analysing  
172 a total of 594 cells from small clones expressing *d::EGFP* in the ventral epidermis of 44  
173 different larvae. Each cell was assigned a row number and polarity: rows of cells were  
174 identifiable by proximity to conspicuous landmarks like denticles, sensory cells, and  
175 tendons with unique shape, while polarity was scored by eye based on whether  
176 D::EGFP fluorescence was exclusively on the anterior (Anterior membrane) or  
177 posterior (Posterior membrane) side of their plasma membrane, unpolarised but  
178 clearly enriched at the membrane (Uniform membrane), or homogeneously  
179 distributed in the cytoplasm (Uniform cytoplasm).

## 180 **Analysis of Microtubule Growth Direction**

181 Orientation of growing microtubules was analysed following EB1::EGFP comets in  
182 ventral larval epidermal cells. Clonal expression of *EB1::EGFP* was necessary to avoid

183 interference from the strong signal of underlying muscle cells, and undenticulate  
184 regions were preferred because denticles obscured the fluorescent signal. Early second  
185 stage larvae were mounted in a small drop of water ensuring their posterior spiracles  
186 were out of the liquid, and movies of individual cells were recorded at 5.16 s intervals  
187 for typically 5 min, imaging a single 0.773 $\mu$ m apical confocal plane. Movie frames  
188 were registered using the ImageJ plugin Stackreg [26] to account for slight movements  
189 of the larvae. Cells were then aligned to the mediolateral axis using the T3 row of  
190 tendon cells and rows of denticles as references, and cells situated in the right  
191 hemisegments were flipped to match the mediolateral orientation of the left  
192 hemisegment cells. Two cells, one in the A compartment (row 7 or 8) and one in the P  
193 (row -2 or -1), were selected from each of 10 larvae and pooled for blind analysis.  
194 Comets were traced manually using the ImageJ plugin MtrackJ [27], sampling all the  
195 visible comets within each cell for as many time points as were necessary to count  
196 150-200 comets per cell, and angles of the comets' trajectories relative to the  
197 anteroposterior axis of the larva were derived from the first and last time point of their  
198 tracks.

## 199 Data Analysis

200 Data analysis was carried out in R 3.5.3 [28], using the *CircMLE* [29], *circular* [30],  
201 *DescTools* [31], *dplyr* [32], *ggplot2* [33], and *mosaic* [34] packages.

## 202 Data Availability

203 Data used in **figures 4, 8, S1, S4-6** can be obtained from the University of  
204 Cambridge Open Access repository (<https://doi.org/10.17863/CAM.53667>)

# 205 RESULTS

## 206 Comparing wildtype and polarity modified larvae

### 207 (i) Background

208 In this section we reexamine and test the model as exemplified by those single cells  
209 described as “atypical” in which one face of the cell's membrane abuts two different  
210 neighbours [17]. Some of these cells are multipolar and these exemplify very strongly



211 the argument that PCP stems from a comparison between the facing membranes of a  
212 single cell. These atypical and multipolar cells are now studied in “polarity modified”  
213 larvae, in which the overall segmental polarity has been considerably modified by  
214 experiment. Unlike previously, we study the predenticles, that is denticles observed  
215 prior to the deposition of cuticle.

216 We compare the cell polarity of wildtype [15, 17] and polarity modified larvae  
217 (**figure 2**). To make the polarity modified larvae, we engineer increased expression of  
218 an active form of *ds* in T1 and T2 cells (*sr.Gal4 UAS.ectoDs* [15]); this changes the  
219 landscape of Ds activity, making peaks (instead of troughs, as in the wildtype) in T1  
220 and T2. Consequently, the polarities of rows of cells 1, 2, 4 and 5, that abut T1 and T2,  
221 now point inwards; that is reversed from the wildtype (**figure 2**). The other rows, 0, 3  
222 and 6 could also be affected because polarity can be propagated beyond the  
223 neighbouring cells [8, 9, 15]. To explain further how the Ds/Ft machine propagates  
224 polarity changes from cell to cell: an increase in Ds activity in cell *a* attracts more Ft  
225 on the facing membrane of cell *b*. On that facing membrane more Ft tends to exclude  
226 Ds activity, enabling more Ds to accumulate on the far side of cell *b* which will, in  
227 turn, draw more Ft to the facing membrane of cell *c* [5, 7].

## 228 (ii) Atypical cells

229 In all larvae, the numbered cell rows are often irregular and some atypical cells may  
230 individually abut on the same side two neighbours, each with a different level of Ds  
231 activity. We compare the predenticles of atypical cells in wildtype and polarity  
232 modified larvae. In the wildtype, one posterior part of cell *a* in row 4 may contact a T2  
233 neighbour with a lower Ds activity than row 3 (the associated predenticles in this  
234 region of cell *a* point anteriorly) and a separate part of cell *a* may contact a row 4  
235 neighbour with a higher Ds activity than row 3 [17]. However, in the polarity  
236 modified larvae, the predenticles of nearly all cells of row 4 (typical and atypical cells)  
237 point posteriorly —this is as expected from the model because **both** types of posterior  
238 neighbour that can abut a row 4 cell (T2 and another row 4 cell) now have higher  
239 levels of Ds activity than the anterior neighbour, a row 3 cell (**figure 2A-C** and **table**  
240 **1**). However for these polarity modified larvae, some single atypical cells of row 2 have  
241 two anterior neighbours —cells of T1 and row 2— that are higher and lower in Ds

242 activity than the posterior neighbour of the atypical cell, respectively. Consequently,  
243 the model predicts that their associated pre-denticles should point forwards in that part  
244 of the cell that abuts T1 and backwards in that part of the same cell abutting row 2,  
245 and they do (**figure 2D-F** and **table 1**). There are some quantitative differences  
246 between the current data and the wildtypes we scored earlier ([17], see legend to **table**  
247 **1**). Nevertheless, these results, especially on the polarity modified larvae, confirm and  
248 strengthen a model of PCP in which cells in a tissue are polarised due to an underlying  
249 gradient of Ds activity.

### 250 **Direct assessment of Ds distribution in both wildtype and polarity modified** 251 **larvae**

252 We measure the native Ds distribution using a tagged Ds molecule expressed as in the  
253 wildtype. Ds accumulates as puncta in the membrane (**figure 3**, [14, 35]) and,  
254 presumably, the puncta contain or consist of Ds-Ft heterodimers [36].

255 We previously inferred but did not show directly a supracellular gradient in Ds  
256 activity that rises within the A compartment reaching a peak near the rear of that  
257 compartment and then falling into the P [16]. We therefore quantified and compared  
258 the amount of Ds localised at cell junctions in all rows of the segment in the larval  
259 ventral epidermis. These measurements do not evidence an overall gradient. However,  
260 both junctions 9/T3 and T3/10 show a higher amount of tagged Ds than the other  
261 boundaries; these junctions are located near the rear of the A compartment (**figure 4**).  
262 We applied the same quantitation technique to polarity modified larvae and found  
263 that the distribution of Ds is altered from the wildtype as expected (**figure S1**), in a  
264 way that validates our quantification technique and consequently the existence of a  
265 peak of Ds levels near the rear of the A compartment in the wildtype (**figure 4**).

### 266 **The location of Dachs**

267 The myosin-related molecule D is a marker of polarity and localised by the Ds/Ft  
268 system [5, 14, 37-39]. It is usually asymmetrically distributed on a polarised cell and is  
269 thought to co-localise with the face of the cell associated with the most Ds [14, 38, 39].  
270 We map D to the membranes of individual cells in the larval epidermis by making  
271 small clones of cells that express tagged D; this allows the distribution of D on a

272 particular cell to be assessed so long as the neighbour(s) does not contain any tagged  
273 D.

274 We examine the distribution of D in wildtype larvae in order to reveal the  
275 molecular polarity of cells that lack denticles (**figures 5, 6**). In the P compartment, all  
276 the denticulate and undenticulate cells show a consistent molecular polarity, D being  
277 localised posteriorly in the cell. Most cells of the A compartment have the opposite  
278 polarity, with D located anteriorly. In both compartments, the location of D in the  
279 denticulate cells correlates in all cases with the denticle polarity, and this includes the  
280 cells of rows 0, 1 and 4 whose denticles point forward. The tendon cells, T1, T2 and T3  
281 can express D but it is mostly cytoplasmic in location. The cells flanking T1 and T2  
282 (but not T3) accumulate D at the membrane abutting the tendon cells. Unlike all the  
283 other rows, cells of row 11 show some variation in the localisation of D: about 45%  
284 localise it at the posterior cell membrane, as do cells in the P compartment; in 35% it is  
285 at the membrane but not asymmetrically localised and, in the remaining cells, D is  
286 either at the anterior or found only in the cytoplasm (**figure 6**). This means that the  
287 line where polarity changes from the A-mode to the P-mode is not at the A/P border  
288 [16] but anterior to it; suggesting that the second cell row anterior to the A/P cellular  
289 interface (row 10) contains the peak level of Ds activity. From that row, effects on  
290 polarity spread forwards into the A compartment and backwards into row 11 and the  
291 P compartment (see model in **figure 9**).

292 The localisation of D is not always continuous along the entire face of a cell.  
293 When the plasma membrane of one side of an atypical cell **a** abuts two separate cells,  
294 and our model implies that these two cells have different levels of Ds activity, then the  
295 D from cell **a** is localised at the interface with just one of those cells, on that part of the  
296 membrane that has most Ds activity (cells 10 and 11 in **figure 5C**, and **figure S2**, see  
297 legend). This suggests that different parts of a single cell's membrane can compete for  
298 D.

### 299 **ovo-expressing clones reveal otherwise unseen polarity.**

300 Small clones that overexpress *ovo* in naked areas often produce denticles in embryos  
301 [40, 41]. We made marked clones in larvae and these also generally made denticles.  
302 The denticles showed a consistent orientation, pointing forwards in P and backwards

303 in most of A, exactly mirroring the polarity pattern as identified by D localisation  
304 (**figure 7**, compare with **figure 6**). Thus, cells of row 11 at the rear of the A  
305 compartment mostly made denticles that pointed forwards (**figure 7**) as is  
306 characteristic of cells belonging to the P compartment. Just as signalled by the  
307 localisation of D, in a minority of row 11 cells, polarity was ambiguous with denticles  
308 pointing in various directions (**figure S3**). The denticles belonging to the cell row 10  
309 anterior to row 11 always pointed backwards and denticles of the row behind row 11  
310 (row -2 of the P compartment) always pointed forwards.

### 311 **Does the orientation of growing microtubules correlate with PCP?**

312 We study the orientation of growing microtubules (using EB1 comets, [**42, 43**]) in the  
313 large epidermal cells of the ventral larva. Our main data is collected from identified A  
314 cells of rows 7-8 (direction of PCP is posterior) and identified P cells of rows -2 and -1  
315 (direction of PCP is anterior; **figure 6**); the classification of the A and P cells as having  
316 opposite polarities is based on studies of the larval ventral abdomen described above.  
317 To assess the orientation of growing microtubules, we took 10 larvae, made films and  
318 studied one A and one P cell from each (**movies 1, 2**). The growing microtubules were  
319 then recorded vis-à-vis the axis of the larva by one person (SP) who was blinded to the  
320 identity of each of the 20 cells he was scoring. The orientations of about 4000 EB1  
321 comets are shown and analysed in **figure 8**.

322 In the wing, the predominant alignment of the microtubules is close to the axis  
323 of PCP [**20, 44**]. By contrast, in the larval epidermal cells, in both A and P  
324 compartments, the majority of the microtubules are aligned perpendicular to the  
325 anteroposterior axis, the axis of PCP (**figure 8A,B**). To analyse our data and following  
326 the approach in the wing, the comets of the larvae are sorted into four 90 degree  
327 quadrants centred on the anteroposterior and mediolateral axes and their frequencies  
328 plotted. The quadrants are described as “anterior”, “posterior”, “medial” and “lateral”  
329 (**figure 8C,D**). The axis of PCP lies in the anteroposterior axis, but, in A compartment  
330 cells, 66% of the total angles of growth fall within the medial and lateral sectors, while  
331 in the P compartment the comparable figure is 71%. Clearly there is no overall  
332 correlation between microtubular orientation and PCP, belying the hypothesis that  
333 microtubular orientation is causal for PCP.

334           However, we could look for a limited correlation between the orientation of  
335 growing microtubules and the direction of PCP. For example, considering only the  
336 minority of microtubules within the anterior and posterior sectors, we find  
337 insignificant differences in polarity (**figure 8C,D**). In A cells the proportion of all  
338 microtubules that grow anteriorly is 15.8% with a 95% CI of [13.5 to 18.2] and the  
339 proportion that grow posteriorly is 18.3% [15.9 to 20.6]. In P cells it is the reverse;  
340 16.7% grow anteriorly [14.4 to 19.1] and the proportion that grow posteriorly 12.7%  
341 [10.3 to 15.0]. There was a comparably weak bias in the medial and lateral quadrants:  
342 in A cells a larger proportion of all microtubules grow medially 34.4% [32.0 to 36.8]  
343 than laterally 31.5% [29.1 to 33.8] while the reverse bias occurs in P cells where more  
344 microtubules grow laterally 36.9% [34.5 to 39.2] than medially 33.7% [31.4 to 36.1]  
345 (**figure 8C,D**).

346           How uniform are the individual cells? To answer we group all the growing  
347 microtubules according to which cell (and larva) they come from and according to  
348 which of four 90 degree quadrants they fall into (**figure 8E**). Remarkably, in all sets,  
349 individual cells differ wildly from each other. Comparing the anterior versus posterior  
350 and medial versus lateral quadrants we find no strong evidence for a bias in the  
351 directions in which the microtubules grow —apart from the obvious and main finding  
352 that most of the microtubules grow more or less perpendicular to the axis of PCP.

353           Could there be a special subset of oriented microtubules perhaps aligned close to  
354 the anteroposterior axis, the axis of PCP, that might show a polarity bias that related  
355 to some function in planar polarity? There is no independent evidence favouring such  
356 a perspective. Nevertheless, to check we scan through the entire circumference in 22.5  
357 degree sectors, measuring the amount of bias in the microtubules that fall within  
358 opposite pairs of sectors. There is no increase in bias in the sectors that included the  
359 axis of PCP in either the A or the P compartments, nor in nearby sectors. However,  
360 there is a local peak of bias within the A compartment: there is a significant bias in the  
361 number of growing microtubules within one pair of 22.5 degree sectors that is far  
362 away from the axis of PCP. Within the P compartment a similar peak of bias is  
363 centred near the mediolateral axis within two facing 22.5 degree sectors (**figure S4**).  
364 But note that these biases represent only 2-3% of the total population of microtubules.

365 Thus, although we found some irregularities in the circular distribution of growing  
366 microtubules, we find no correlation with the axis of PCP.

367 Axelrod's group kindly made their raw data from the pupal abdomen available  
368 to us and we treat them exactly as our larval data. Axelrod and colleagues grouped the  
369 angles of growing pupal comets into two unequal sets (two broad sectors of 170  
370 degrees, each including the anteroposterior axis, were compared to each other, while  
371 the remaining microtubules were grouped into two narrow mediolateral sectors of 10  
372 degrees each [22, 23]). But for our analysis, to conform with how data on the wing  
373 have been presented [20, 22, 23], and to allow a comparison with our results, we  
374 subdivided their data into four 90 degree quadrants. Even more so than in the larva,  
375 the majority of the pupal microtubules are oriented orthogonally to the axis of PCP  
376 (**figure S5A-D**): 69% of the total population of growing microtubules in the A  
377 compartment are aligned within the quadrants centred on the mediolateral axis, while  
378 in the P compartment the comparable figure is 73% (**figure S5C,D**). This finding does  
379 not fit comfortably with a hypothesis that microtubular orientation drives PCP.

380 Further comparison of the Axelrod group's data on the pupa with ours on the  
381 larva show some quantitative differences. Unlike ours on the larva, their pupal data  
382 show statistically significant biases in the orientation of comets (**figure S5C,D**). In A  
383 cells the proportion of all microtubules that grow anteriorly is 12.7% with a 95% CI of  
384 [11.3 to 14.1], significantly smaller than the proportion that grow posteriorly 18.1%  
385 [16.6 to 19.5]. In P cells we see a reverse bias: 15.8% [13.3 to 18.2] grow anteriorly and  
386 11.5% [9.1 to 13.9] posteriorly. Notably, there is a comparable and also significant bias  
387 in the medial and lateral quadrants but in the same direction in both compartments.  
388 In A cells a larger proportion of all microtubules grow laterally 38.1% [36.7 to 39.6]  
389 than medially 31.1% [29.7-32.5] and a similar bias occurs in P cells where 39.8% [37.4-  
390 42.3] grow laterally and 32.9% [30.5-35.3] grow medially (**figure S5C,D**).

391 We then plotted all the growing microtubules according to which pupa they  
392 came from and according to which of four 90 degree sectors they fell into (**figure**  
393 **S5E**). Individual pupae differ wildly from each other. In both our results on the larva  
394 and Axelrod's results in the pupa, there is considerable inconsistency between

395 individuals (compare **figure 8E** with **figure S5E**). Only when all cells are taken  
396 together is there any overall and significant polarity bias in Axelrod's data.

397 We classified the growing microtubules in Axelrod's data into 22.5 degree  
398 sectors and looked for an orientation bias within opposite pairs of sectors. We find  
399 examples of significant bias shown by the microtubules in various sector pairs and  
400 these are mostly not near the axis of PCP. In A cells there is a statistically significant  
401 and local peak of bias ca 60-80 degrees divergent from the axis of PCP. In P cells there  
402 is a statistically significant and local peak of bias ca 35-55 degrees divergent from the  
403 axis of PCP (**figure S4**). These observations do not fit with the conjecture that a  
404 special set of oriented microtubules, in or close to the PCP axis, might be driving  
405 planar polarity.

406 Dividing the data into sectors gives the impression of biases in the  
407 anteroposterior as well as in the mediolateral axes (although these are non significant  
408 in the case of the larva). But, because we suspect that subdividing the angles into  
409 sectors may lead to erroneous conclusions we investigated the distributions of the  
410 angles as a whole. We took the angular data of the A and P cells of the larva and pupal  
411 abdomen and using a maximum likelihood model approach [29], we found that the  
412 best fit in all four cases is to a distribution with two peaks each roughly 90 degrees  
413 divergent from the axis of PCP (**figure S6**). Unexpectedly, there are slight deviations  
414 of these peaks in the bimodal distributions; in all four distributions one of the peaks  
415 deviates 10 degrees from the mediolateral axis. Interestingly, the direction of deviation  
416 is opposite in the A cells to that in the P cells; in both sets of A cells one of the peaks is  
417 tilted 10 degree towards the posterior hemi-circumference, whereas in both sets of P  
418 cells one of the peaks is tilted 10 degrees towards the anterior hemicircumference  
419 (**figure S6**, see legend). These opposite deviations in A and P cells may be the basis of  
420 the apparent but weak biases we observe when dividing the data into four quadrants.

## 421 DISCUSSION

### 422 A gradient model?

423 In trying to understand planar cell polarity, *Drosophila* has proved the most amenable  
424 and useful experimental system. Using the *Drosophila* larva, we have built a model of  
425 how the Ds/Ft system determines the pattern of polarity in the abdominal segment  
426 [16, 17]. In this model the Ds/Ft system converts graded slopes in the expression  
427 levels of *ds* and *fj* into local intercellular differences in the levels of Ds activity, and  
428 into PCP without any intervention by the Stan/Fz system [5].

429 Here we have reexamined the model and extended it to those uncharted parts of  
430 the larval segment that lack denticles (**figure 9**). All the observations we have made  
431 give results that are consistent with and support the model. However it is not clear  
432 whether the model requires interactions between Ds, Ft and Fj to produce a  
433 multicellular gradient of Ds levels at the cell membranes, and expectations on this  
434 differ [36]. We originally proposed that the levels of Ds activity would be graded in  
435 opposite ways in the A and the P compartment and ultimately these gradients would  
436 be read out as PCP in each of the cells [16]. We imagined that multicellular gradients  
437 of Ds activity would persist and span the whole field of cells and this has been  
438 assumed by most [5, 7, 45, 46] and actually detected, locally, in the migrating larval  
439 epidermal cells in the pupa [47]. Alternatively, once the arrow of polarity has been  
440 established in each cell, a feedback mechanism could result in a redistribution of  
441 bridges so that, ultimately, each cell would contain the same numbers of bridges,  
442 similarly disposed— there would be no persistent multicellular gradient in Ds activity  
443 (eg [36]). However there would still be differences in the dispositions and orientations  
444 of Ds-Ft bridges between the opposite membranes of each cell. Our current  
445 measurements of Ds levels do not settle the matter: we did not detect a pervasive  
446 gradient of Ds, but amounts were not flat either. We found a peak in Ds level located  
447 near the rear of the A compartment near where a Ds activity gradient was predicted to  
448 summit. However a shallow Ds gradient could still exist — it might be missed because  
449 we quantify only the total Ds present in abutting pairs of membranes. This  
450 shortcoming means that the results can neither tell us the cellular provenance of the  
451 Ds we measure, nor reveal how much of it is in Ds-Ft or in Ft-Ds bridges within the



452 apposed membranes. Thus, if any cell has a higher level of Ds, this Ds will bind more  
453 Ft in the abutting cell membrane, and, we believe, tend to exclude Ds from that  
454 abutting membrane. These effects will tend to even out the amounts of Ds in joint  
455 membranes and therefore tend to disguise any gradients, local peaks or troughs.

456       Could one build the segmental pattern of polarity using only a peak plus  
457 propagation, thereby managing without any initial gradient of *ds* expression? If so, a  
458 localised peak in amount of Ds at the rear of the A compartment (with a maximum in  
459 row 10) could affect polarity forwards into row 9 and beyond, and propagate  
460 backwards through row 11 into the P compartment. The single cell troughs in Ds  
461 activity in T1 and T2 would orient the polarity of the flanking cells to point away from  
462 these tendon cells. All these polarity effects would reinforce each other to make a more  
463 robust pattern. However, if there were no initial gradient of *ds* expression, only row 3  
464 would present a problem; in order to explain why it points backwards, the trough of  
465 T1 in Ds activity would need to be deeper than that of T2 (see figure 4 in [15]).  
466 Perhaps it will prove important to note that the gradient model and the alternative  
467 localised peak and troughs model just outlined are not mutually exclusive and each  
468 can contain aspects of the truth.

469       Originally predicted to be at the A/P compartment border [16] we conclude  
470 now that a Ds peak occurs two cells anterior to that border, in row 10 (**figure 9**, a  
471 similar peak two cells from the A/P border has been described in the dorsal abdomen  
472 of the pupa [47]). This observation is supported by both D localisation and the  
473 orientation of ectopic denticles formed by *ovo*-expressing clones. There are interesting  
474 implications: the peak in Ds protein at the cell junctions is in a cell that is flanked on  
475 both sides by A compartment cells, the most posterior of which (row 11) has “P type”  
476 polarity. Why is this summit out of register with the lineage compartments? It could  
477 be that this peak is specified by a signal emanating from one compartment and  
478 crossing over to affect the next compartment. There are precedents for this kind of  
479 transgression [48-52]. Also, in the abdomen of the developing adult fly, Hedgehog  
480 signal spreads from the P compartment across into the A compartment and induces  
481 different types of cuticle at different distances [53].

482 Our results can best be interpreted, as others have done [14, 37, 54], that D acts  
483 as an eloquent marker of a cell's polarity, is localised on the membrane with the most  
484 Ds, and acts immediately downstream of the Ds/Ft system.

### 485 **Microtubules and PCP**

486 We have suggested [17] that intracellular conduits might be involved in a local  
487 comparison between facing membranes of a cell and shown here that this perspective  
488 successfully predicts which cells should become bipolar even in polarity modified  
489 larvae. But there is still no direct evidence for the conduits, and no knowledge of, if  
490 they do exist, what they are. One could imagine a set of microtubules, initiated on the  
491 membrane, that could align more or less with the anteroposterior axis and traverse the  
492 cell to meet the membrane opposite. Indeed, Uemura's group have proposed that  
493 microtubules, oriented by the Ds/Ft system, translocate vesicles carrying PCP  
494 components such as Frizzled (Fz) and Dishevelled (Dsh) to one side of a cell to  
495 polarise it. Their hypothesis began with observations on microtubule-dependent  
496 transport of tagged proteins *in vivo* in cells of the wing disc [19] and was extended by  
497 the use of EB1 comets to plot microtubule polarity in the pupal wing [20-23].  
498 Harumoto and colleagues studied the proximal part of the wing where they found a  
499 transient correlation, with a small majority of the microtubules growing distally, but  
500 there was no such correlation in the distal wing. Also, in *ds<sup>-</sup>* wings, distal regions show  
501 consistently polarised microtubules (a small majority now grow proximally), although  
502 the hairs in that region still point distally [20]. Likewise, while some studies of the  
503 adult abdomen demonstrate a local correlation between cell polarity and the  
504 orientation of limited subsets of microtubules, PCP in other parts did not show this  
505 correlation and the authors concluded that, in those parts, polarity is determined  
506 independently of the microtubules [23]. We have tested the hypothesis that  
507 microtubular orientation drives PCP in the larval abdomen of *Drosophila* and there it  
508 also meets serious difficulties. The greatest of these is that most of the microtubules  
509 are aligned orthogonally to the axis of PCP (this fact is also extractable from the pupal  
510 data kindly provided by Axelrod's group). Of the roughly 30% of all microtubules that  
511 fall into the two quadrants centred on the axis of PCP, there is a small net excess,  
512 corresponding to about 5% of the total, that could perhaps result in a net transport of

513 vesicles in the direction of PCP. But even if this were so, more than 80% of the vesicles  
514 carrying cargo should arrive in the wrong part of the cell membrane.

515         Why are there apparent biases in microtubule orientation in the data? An  
516 analysis of the circular distribution of comets showed, in all the sets of data (ours and  
517 those of Axelrod's group), a deviation of 10 degrees in one of the peaks of the bimodal  
518 distribution of the angles (**figure S6**). This deviation, plus the precise orientation of  
519 the 90 degree quadrants, may explain the apparent bias of microtubular orientation  
520 seen clearly in the Axelrod data and hinted at much more weakly in our data. How?  
521 Imagine a circular bimodal distribution composed of two separate unimodal  
522 distributions: the tails of both probability distributions would be closer and overlap  
523 more if the distance between the mean angles were reduced. In our cases, one of the  
524 tails of the distributions whose mean angles deviate by 10 degrees will decrease slightly  
525 the frequency of angles within one of the anteroposterior quadrants and  
526 concomitantly the other tail increase the frequency in the opposite anteroposterior  
527 quadrant. This deviation may have its origin in a correlation between cell shape and  
528 microtubular orientation [44, 55, 56] and in different cell shapes in the A and P cells;  
529 these are more obvious at or close to the A/P border [57].

530         The hypothesis of Uemura's group which proposes that microtubules transport  
531 Fz to one side of the cell to polarise it meets an additional problem in the larval  
532 abdomen. The normal orientations of the denticles in the larva does not require input  
533 from the Stan/Fz system; indeed the Ds/Ft system appears to act alone [7-9]. But could  
534 oriented microtubules be involved in PCP, even without any role of the Stan/Fz  
535 system? Our results from the larval abdomen say no. We cannot exclude the  
536 possibility of a small subset of stable microtubules (undetectable because they would  
537 not bind EB1), aligned with the anteroposterior axis and strongly biased in polarity, in  
538 the pupal or larval abdomens (or proximodistal axis in the wing). There is no evidence  
539 for such microtubules, but if they exist their number and bias in orientation must be  
540 strong enough to overcome the moving of vesicles on the unbiased dynamic  
541 microtubules we have studied.

## 542 **Conclusions**

543 We have enhanced our present model of how the Ds/Ft system generates the intricate  
544 polarity of the larval segment. The key element of this model is that each cell  
545 compares its neighbours and is polarised (and points its denticles) towards the cell  
546 presenting the most Ds activity. This hypothesis gains more support from our new  
547 results on the multipolarity of single cells. But we have not found out how the  
548 comparison is made: an attractive hypothesis by others was that oriented microtubules  
549 are the critical agent, but, if we interrogate our data for biases in polarity within all the  
550 growing microtubules, or if we select subsets of microtubules whose orientations are  
551 related to the axis of PCP, we do not find evidence for a link between microtubular  
552 polarity and the polarity of the denticles (the “direction” of PCP). Using two different  
553 methods we demonstrated that undenticulated cells are also polarised and their polarity  
554 is as the model predicts, and that the point where the amount of Ds is, presumably,  
555 highest and from where, like a watershed divide, polarity diverges, is two cells away  
556 from the compartment border. We looked to demonstrate the predicted multicellular  
557 gradient of Ds but, possibly because of an insufficiency in our methods, we only found  
558 a localised peak (at the rear of the A compartment as the model requires). Thus, if  
559 there is a multicellular gradient of Ds activity, it must be very shallow. There’s still  
560 much to do; still so much to learn.

## 561 **ACKNOWLEDGEMENTS**

562 We thank Jeffrey Axelrod and Katherine Sharp for kindly sharing data from the  
563 Axelrod group (published in [22, 23]), and David Strutt, Eduardo Moreno, and the  
564 Bloomington Stock Center for flies.

## 565 **COMPETING INTERESTS**

566 The authors declare that no competing interests exist.

## 567 FUNDING

568 Our work was supported by Wellcome Investigator Award 107060 to PAL.

## 569 REFERENCES

- 570 1 Goodrich, L. V., Strutt, D. 2011 Principles of planar polarity in animal  
571 development. *Development*. **138**, 1877-1892. (10.1242/dev.054080)
- 572 2 Henderson, D. J., Long, D. A., Dean, C. H. 2018 Planar cell polarity in organ  
573 formation. *Curr. Opin. Cell Biol.* **55**, 96-103. (10.1016/j.ceb.2018.06.011)
- 574 3 Devenport, D. 2016 Tissue morphodynamics: Translating planar polarity cues  
575 into polarized cell behaviors. *Semin. Cell Dev. Biol.* **55**, 99-110.  
576 (10.1016/j.semcdb.2016.03.012)
- 577 4 Butler, M. T., Wallingford, J. B. 2017 Planar cell polarity in development and  
578 disease. *Nat. Rev. Mol. Cell Biol.* **18**, 375-388. (10.1038/nrm.2017.11)
- 579 5 Lawrence, P. A., Casal, J. 2018 Planar cell polarity: two genetic systems use one  
580 mechanism to read gradients. *Development*. **145**, (10.1242/dev.168229)
- 581 6 Carvajal-Gonzalez, J. M., Mlodzik, M. 2014 Mechanisms of planar cell polarity  
582 establishment in *Drosophila*. *F1000Prime Rep.* **6**, 98. (10.12703/P6-98)
- 583 7 Casal, J., Lawrence, P. A., Struhl, G. 2006 Two separate molecular systems,  
584 Dachsous/Fat and Starry night/Frizzled, act independently to confer planar cell  
585 polarity. *Development*. **133**, 4561-4572. (10.1242/dev.02641)
- 586 8 Donoughe, S., DiNardo, S. 2011 dachsous and frizzled contribute separately to  
587 planar polarity in the *Drosophila* ventral epidermis. *Development*. **138**, 2751-  
588 2759. (10.1242/dev.063024)
- 589 9 Repiso, A., Saavedra, P., Casal, J., Lawrence, P. A. 2010 Planar cell polarity: the  
590 orientation of larval denticles in *Drosophila* appears to depend on gradients of  
591 Dachsous and Fat. *Development*. **137**, 3411-3415. (10.1242/dev.047126)
- 592 10 Simon, M. A., Xu, A., Ishikawa, H. O., Irvine, K. D. 2010 Modulation of  
593 Fat:dDchsous binding by the cadherin domain kinase Four-jointed. *Curr. Biol.*  
594 **20**, 811-817. (10.1016/j.cub.2010.04.016)
- 595 11 Ishikawa, H. O., Takeuchi, H., Haltiwanger, R. S., Irvine, K. D. 2008 Four-  
596 jointed is a Golgi kinase that phosphorylates a subset of cadherin domains.  
597 *Science*. **321**, 401-404. (10.1126/science.1158159)
- 598 12 Brittle, A., Repiso, A., Casal, J., Lawrence, P. A., Strutt, D. 2010 Four-jointed  
599 modulates growth and planar polarity by reducing the affinity of Dachsous for  
600 Fat. *Curr. Biol.* **20**, 803-810. (10.1016/j.cub.2010.03.056)
- 601 13 Ambegaonkar, A. A., Pan, G., Mani, M., Feng, Y., Irvine, K. D. 2012  
602 Propagation of Dachsous-Fat planar cell polarity. *Curr. Biol.* **22**, 1302-1308.  
603 (10.1016/j.cub.2012.05.049)

- 604 14 Brittle, A., Thomas, C., Strutt, D. 2012 Planar polarity specification through  
605 asymmetric subcellular localization of Fat and Dachsoous. *Curr. Biol.* **22**, 907-  
606 914. (10.1016/j.cub.2012.03.053)
- 607 15 Saavedra, P., Brittle, A., Palacios, I. M., Strutt, D., Casal, J., Lawrence, P. A. 2016  
608 Planar cell polarity: the Dachsoous/Fat system contributes differently to the  
609 embryonic and larval stages of *Drosophila*. *Biol. Open.* **5**, 397-408.  
610 (10.1242/bio.017152)
- 611 16 Casal, J., Struhl, G., Lawrence, P. A. 2002 Developmental compartments and  
612 planar polarity in *Drosophila*. *Curr. Biol.* **12**, 1189-1198. (10.1016/s0960-  
613 9822(02)00974-0)
- 614 17 Rovira, M., Saavedra, P., Casal, J., Lawrence, P. A. 2015 Regions within a single  
615 epidermal cell of *Drosophila* can be planar polarised independently. *eLife.* **4**,  
616 e06303. (10.7554/eLife.06303)
- 617 18 Saavedra, P., Vincent, J. P., Palacios, I. M., Lawrence, P. A., Casal, J. 2014  
618 Plasticity of both planar cell polarity and cell identity during the development of  
619 *Drosophila*. *eLife.* **3**, e01569. (10.7554/eLife.01569)
- 620 19 Shimada, Y., Yonemura, S., Ohkura, H., Strutt, D., Uemura, T. 2006 Polarized  
621 transport of Frizzled along the planar microtubule arrays in *Drosophila* wing  
622 epithelium. *Dev. Cell.* **10**, 209-222. (10.1016/j.devcel.2005.11.016)
- 623 20 Harumoto, T., Ito, M., Shimada, Y., Kobayashi, T. J., Ueda, H. R., Lu, B.,  
624 Uemura, T. 2010 Atypical cadherins Dachsoous and Fat control dynamics of  
625 noncentrosomal microtubules in planar cell polarity. *Dev. Cell.* **19**, 389-401.  
626 (10.1016/j.devcel.2010.08.004)
- 627 21 Matis, M., Russler-Germain, D. A., Hu, Q., Tomlin, C. J., Axelrod, J. D. 2014  
628 Microtubules provide directional information for core PCP function. *eLife.* **3**,  
629 e02893. (10.7554/eLife.02893)
- 630 22 Olofsson, J., Sharp, K. A., Matis, M., Cho, B., Axelrod, J. D. 2014 Prickle/spiny-  
631 legs isoforms control the polarity of the apical microtubule network in planar  
632 cell polarity. *Development.* **141**, 2866-2874. (10.1242/dev.105932)
- 633 23 Sharp, K. A., Axelrod, J. D. 2016 Prickle isoforms control the direction of tissue  
634 polarity by microtubule independent and dependent mechanisms. *Biol. Open.* **5**,  
635 229-236. (10.1242/bio.016162)
- 636 24 Thurmond, J., Goodman, J., Strelets, V., Attrill, H., Gramates, L., Marygold, S.,  
637 Matthews, B., Millburn, G., Antonazzo, G., Trovisco, V., *et al.* 2019 FlyBase 2.0:  
638 the next generation. *Nucleic Acids Res.* **47**, D759–D765. (10.1093/nar/gky1003)
- 639 25 Ferreira, T., Hiner, M., Rueden, C., Miura, K., Eglinger, J., Chef, B. BAR 1.5.1.  
640 2017 Available from: <https://doi.org/10.5281/zenodo.495245>
- 641 26 Thevenaz, P., Ruttimann, U. E., Unser, M. 1998 A pyramid approach to subpixel  
642 registration based on intensity. *IEEE T. Image Process.* **7**, 27-41.  
643 (10.1109/83.650848)
- 644 27 Meijering, E., Dzyubachyk, O., Smal, I. 2012 Methods for cell and particle  
645 tracking. *Methods Enzymol.* **504**, 183-200. (10.1016/b978-0-12-391857-4.00009-  
646 4)

- 647 28 R Core Team. R: A Language and Environment for Statistical Computing.  
648 Vienna, Austria: R Foundation for Statistical Computing 2019.
- 649 29 Fitak, R. R., Johnsen, S. 2017 Bringing the analysis of animal orientation data  
650 full circle: model-based approaches with maximum likelihood. *J. Exp. Biol.* **220**,  
651 3878-3882. (10.1242/jeb.167056)
- 652 30 Agostinelli, C., Lund. R package 'circular': Circular Statistics (version 0.4-93).  
653 2017 Available from: <https://r-forge.r-project.org/projects/circular/>
- 654 31 Signorell, A., multiple authors. DescTools: Tools for Descriptive Statistics.  
655 2019 Available from: <https://cran.r-project.org/package=DescTools>
- 656 32 Wickham, H., François, R., Henry, L., Müller, K. dplyr: A Grammar of Data  
657 Manipulation. 2019 Available from: [https://CRAN.R-](https://CRAN.R-project.org/package=dplyr)  
658 [project.org/package=dplyr](https://CRAN.R-project.org/package=dplyr)
- 659 33 Wickham, H. 2016 *ggplot2: Elegant Graphics for Data Analysis*. Springer-Verlag  
660 New York.
- 661 34 Pruim, R., Kaplan, D. T., Horton, N. J. 2017 The mosaic Package: Helping  
662 Students to 'Think with Data' Using R. *R J.* **9**, 77-102.
- 663 35 Ma, D., Yang, C. H., McNeill, H., Simon, M. A., Axelrod, J. D. 2003 Fidelity in  
664 planar cell polarity signalling. *Nature.* **421**, 543-547. (10.1038/nature01366)
- 665 36 Hale, R., Brittle, A. L., Fisher, K. H., Monk, N. A., Strutt, D. 2015 Cellular  
666 interpretation of the long-range gradient of Four-jointed activity in the  
667 *Drosophila* wing. *eLife.* **4**, e05789. (10.7554/eLife.05789)
- 668 37 Bosveld, F., Bonnet, I., Guirao, B., Tlili, S., Wang, Z., Petitalot, A., Marchand, R.,  
669 Bardet, P. L., Marcq, P., Graner, F., *et al.* 2012 Mechanical control of  
670 morphogenesis by Fat/Dachsous/Four-jointed planar cell polarity pathway.  
671 *Science.* **336**, 724-727. (10.1126/science.1221071)
- 672 38 Mao, Y., Rauskolb, C., Cho, E., Hu, W. L., Hayter, H., Minihan, G., Katz, F. N.,  
673 Irvine, K. D. 2006 Dachs: an unconventional myosin that functions downstream  
674 of Fat to regulate growth, affinity and gene expression in *Drosophila*.  
675 *Development.* **133**, 2539-2551. (10.1242/dev.02427)
- 676 39 Rogulja, D., Rauskolb, C., Irvine, K. D. 2008 Morphogen control of wing growth  
677 through the Fat signaling pathway. *Dev. Cell.* **15**, 309-321.  
678 (10.1016/j.devcel.2008.06.003)
- 679 40 Delon, I., Chanut-Delalande, H., Payre, F. 2003 The Ovo/Shavenbaby  
680 transcription factor specifies actin remodelling during epidermal differentiation  
681 in *Drosophila*. *Mech. Dev.* **120**, 747-758. (10.1016/s0925-4773(03)00081-9)
- 682 41 Walters, J. W., Dilks, S. A., DiNardo, S. 2006 Planar polarization of the denticle  
683 field in the *Drosophila* embryo: roles for Myosin II (zipper) and fringe. *Dev.*  
684 *Biol.* **297**, 323-339. (10.1016/j.ydbio.2006.04.454)
- 685 42 Akhmanova, A., Steinmetz, M. O. 2008 Tracking the ends: a dynamic protein  
686 network controls the fate of microtubule tips. *Nat. Rev. Mol. Cell Biol.* **9**, 309-  
687 322. (10.1038/nrm2369)

- 688 43 Schuyler, S. C., Pellman, D. 2001 Microtubule "plus-end-tracking proteins": The  
689 end is just the beginning. *Cell*. **105**, 421-424. (10.1016/s0092-8674(01)00364-6)
- 690 44 Gomez, J. M., Chumakova, L., Bulgakova, N. A., Brown, N. H. 2016 Microtubule  
691 organization is determined by the shape of epithelial cells. *Nat. Commun.* **7**,  
692 13172. (10.1038/ncomms13172)
- 693 45 Fulford, A. D., McNeill, H. 2019 Fat/Dachsous family cadherins in cell and  
694 tissue organisation. *Curr. Opin. Cell Biol.* **62**, 96-103.  
695 (10.1016/j.ceb.2019.10.006)
- 696 46 Matis, M., Axelrod, J. D. 2013 Regulation of PCP by the Fat signaling pathway.  
697 *Genes Dev.* **27**, 2207-2220. (10.1101/gad.228098.113)
- 698 47 Arata, M., Sugimura, K., Uemura, T. 2017 Difference in Dachsous levels  
699 between migrating cells coordinates the direction of collective cell migration.  
700 *Dev. Cell*. **42**, 479-497 e410. (10.1016/j.devcel.2017.08.001)
- 701 48 Basler, K., Struhl, G. 1994 Compartment boundaries and the control of  
702 Drosophila limb pattern by Hedgehog protein. *Nature*. **368**, 208-214.  
703 (10.1038/368208a0)
- 704 49 Diaz-Benjumea, F. J., Cohen, S. M. 1995 Serrate signals through Notch to  
705 establish a Wingless-dependent organizer at the dorsal/ventral compartment  
706 boundary of the Drosophila wing. *Development*. **121**, 4215-4225.
- 707 50 Doherty, D., Feger, G., Younger-Shepherd, S., Jan, L. Y., Jan, Y. N. 1996 Delta is  
708 a ventral to dorsal signal complementary to Serrate, another Notch ligand, in  
709 Drosophila wing formation. *Genes Dev.* **10**, 421-434. (10.1101/gad.10.4.421)
- 710 51 Lawrence, P. A., Struhl, G. 1996 Morphogens, compartments, and pattern:  
711 lessons from Drosophila? *Cell*. **85**, 951-961. (10.1016/s0092-8674(00)81297-0)
- 712 52 Tabata, T., Takei, Y. 2004 Morphogens, their identification and regulation.  
713 *Development*. **131**, 703-712. (10.1242/dev.01043)
- 714 53 Struhl, G., Barbash, D. A., Lawrence, P. A. 1997 Hedgehog organises the pattern  
715 and polarity of epidermal cells in the Drosophila abdomen. *Development*. **124**,  
716 2143-2154.
- 717 54 Ambegaonkar, A. A., Irvine, K. D. 2015 Coordination of planar cell polarity  
718 pathways through Spiny-legs. *eLife*. **4**, e09946. (10.7554/eLife.09946)
- 719 55 Picone, R., Ren, X., Ivanovitch, K. D., Clarke, J. D., McKendry, R. A., Baum, B.  
720 2010 A polarised population of dynamic microtubules mediates homeostatic  
721 length control in animal cells. *PLoS Biology*. **8**, e1000542.  
722 (10.1371/journal.pbio.1000542)
- 723 56 Singh, A., Saha, T., Begemann, I., Ricker, A., Nusse, H., Thorn-Seshold, O.,  
724 Klingauf, J., Galic, M., Matis, M. 2018 Polarized microtubule dynamics directs  
725 cell mechanics and coordinates forces during epithelial morphogenesis. *Nat.*  
726 *Cell Biol.* **20**, 1126-1133. (10.1038/s41556-018-0193-1)
- 727 57 Umetsu, D., Aigouy, B., Aliee, M., Sui, L., Eaton, S., Julicher, F., Dahmann, C.  
728 2014 Local increases in mechanical tension shape compartment boundaries by



- 729            biasing cell intercalations. *Curr. Biol.* **24**, 1798-1805.  
730            (10.1016/j.cub.2014.06.052)
- 731    58    Blair, S. S. 1995 Compartments and appendage development in *Drosophila*.  
732            *BioEssays*. **17**, 299-309. (10.1002/bies.950170406)
- 733    59    Sison, C. P., Glaz, J. 1995 Simultaneous confidence intervals and sample size  
734            determination for multinomial proportions. *J. Am. Stat. Assoc.* **90**, 366-369.  
735            (10.1080/01621459.1995.10476521)
- 736

## 737 FIGURE LEGENDS

738 **Figure 1.** Larval ventral abdomen and Ds activity landscape. (A) Overview of  
739 segments with cells expressing GFP under the control of the *engrailed* promoter, a  
740 marker of the P compartment [51, 58]. GFP labels four rows of cells, between the  
741 most posterior row of the A compartment (identified by sensory cells, S) and the most  
742 anterior row of the following segment (tendon cells T1, see [18]). This driver  
743 occasionally also weakly labels a few cells at the rear of the A compartment (asterisks),  
744 but we have found that these cells do not express other P markers such as *hedgehog*  
745 (data not shown). Cell outlines and denticles are labelled in magenta (DE-  
746 cad::tomato). Arrows point to sensory cells (s) that we used as positional markers. (B)  
747 Ventral denticulate area of a mid second stage larva. Predenticles (rows 0 to 6) and  
748 tendon cells (rows T1 and T2) are marked in green (UTRN::GFP, labelling actin), and  
749 cell boundaries in magenta (DE-cad::tomato). The rows are not completely regular;  
750 here, one T2 cell contacts two row 6 cells at the posterior (asterisk) — typically, T2  
751 only contacts row 5 cells. (C) A partially documented model of the landscape of Ds  
752 and Fj and therefore of PCP in the wild type [15, 17]. In this model, a presumed low  
753 level of *ds* expression together with a documented high level of Fj reduces Ds activity  
754 in T1 and T2. The sloped line in each cell indicates different amounts of Ds activity at  
755 its anterior and posterior limits, the direction of the slope correlating with the cell's  
756 polarity. Denticle polarity is shown below and is a readout of the presumed landscape  
757 of Ds activity: each cell points its denticles towards the neighbour with the higher Ds  
758 activity. Two rows of the P compartment are highlighted in blue, tendon cells are  
759 shaded in grey. Anterior is to the left in all figures. Scale bars: 20µm.

760 **Figure 2.** PCP and atypical cells in polarity modified larvae. Denticulate areas of  
761 polarity modified larvae: (A-C) an atypical cell in row 4 (having two posterior  
762 neighbours with different Ds activity), and (D-F) an atypical cell in row 2 (having two  
763 anterior neighbours with different Ds activity). Predenticles and denticles in rows 1, 2  
764 and 4, 5 with polarity opposite from wildtype are highlighted in magenta. (A,D)  
765 Images of predenticles, tendon cells, and cell boundaries labelled as in **figure 1B**. (B,E)  
766 Schemes of cell outlines and predenticle orientation. (C,F) Models of polarity  
767 modified larvae, Ds activity landscape and denticle polarity in cross sections taken at

768 the dotted blue lines in **B,E**. Blue shading indicates P compartment cells, grey denotes  
769 tendon cells, magenta marks the atypical cell. Note that, contrary to wildtype [17], in  
770 polarity modified larvae row 4 atypical cells are monopolar (**A,B**), while row 2 atypical  
771 cells are multipolar (**D,E**). For quantitation of predenticle polarity in row 4 and row 2  
772 atypical cells of wild type and polarity modified larvae, see **Table 1**. Scale bars: 20 $\mu$ m.

773 **Figure 3.** Ds localisation in the larval ventral abdomen. Larvae expressing *ds::EGFP*  
774 from the tagged endogenous *ds* locus [14] show a ubiquitous punctate pattern of  
775 fluorescence that concentrates on plasma membranes. (**A**) Denticulate and (**B**)  
776 undenticulate areas of early second stage larvae; the cell rows exhibit no obvious  
777 differences in *ds* expression or distribution, with the exception of the strong signal  
778 around T3 tendon cells. (**C**) Detail of Ds localisation in puncta at the cell membrane. 0  
779 to 6, denticle cell rows. 7 to -2, undenticulate cell rows. S, sensory cell. T1, T2, T3,  
780 tendon cell rows. Scale bars: 20 $\mu$ m (**A,B**), 10 $\mu$ m (**C**).

781 **Figure 4.** Quantitation of Ds levels at cellular interfaces across the segment. (**Top**) Dot  
782 plot of normalised fluorescence intensity maxima corresponding to amounts of Ds at  
783 boundaries between cell rows of the larval ventral abdomen. Data are pooled from 12  
784 (denticulate area) and 5 (undenticulate area) images of different larvae. Mean value  
785 and 95% confidence interval for each interface are indicated in red. Letters arise from  
786 Tukey's multiple comparison test between all interfaces; in the Tukey's test,  
787 comparisons between pairs belonging to a group with the same letter show a p value  
788 equal to or greater than 0.05. Groups can be assigned more than one letter, reflecting  
789 "overlap" between different groups. The graph shows no evidence for a segment-wide  
790 gradient of Ds accumulation at the cell membranes, however the 9/T3 and T3/10  
791 boundaries are significantly different from all others, indicating a clear peak anterior  
792 to the A/P boundary. (**Middle**) Diagram of denticle polarity, as in **figure 1C**. Sensory  
793 cells identify rows 8 and 11. (**Bottom**) Comparisons between Ds amounts at posterior  
794 and anterior interfaces of each cell row. Differences in mean normalised fluorescence  
795 at the opposite sides of a cell are calculated with 95% confidence interval by Tukey's  
796 test. Red indicates a significant difference. Note the significant and opposite

797 differences in cell rows 9 and 10, highlighting the presence of a fluorescence peak  
798 around T3.

799 **Figure 5.** D polarity at the plasma membrane in small clones. (A) Several cells of the A  
800 compartment expressing *d::EGFP*: in row 4, where denticles point anteriorly, D is  
801 mostly on the posterior membrane; in rows 5, 6 and 7, with posterior-pointing  
802 polarity, D accumulates instead at the anterior face of the cells. Round or comma-like  
803 structures are due to autofluorescence from overlying denticles. (B) A posterior cell  
804 (row -2) accumulates D at its rear, arguing for anterior-pointing polarity. P  
805 compartment is labelled in magenta by *en.Gal4 UAS.DsRed*. (C) Cells of rows 10 and  
806 11, where D localises on the anterior and posterior sides of the plasma membrane,  
807 respectively (see **figure S2** for cell outlines). (D) Row 10 cell with more D on the  
808 anterior side of the cell membrane, suggesting its polarity points backwards. The  
809 sensory cell process associated with row 11 also expresses *d::EGFP*, and as with other  
810 cells from row 11 has most D at the posterior side. S, sensory cell. Scale bars: 10µm.

811 **Figure 6.** The localisation of D cell by cell. D localisation in all the cell rows, derived  
812 from the analysis of small clones expressing *d::EGFP*. Cells where D accumulates on  
813 just the anterior side of the plasma membrane contribute to red circles (Anterior  
814 membrane), cells where D is only on the posterior side to blue circles (Posterior  
815 membrane), cells where D is enriched at the plasma membrane but in an unpolarised  
816 manner to grey circles (Uniform membrane), and cells where D is homogeneously  
817 distributed in the cytoplasm to orange circles (Uniform cytoplasm). The position of  
818 each circle denotes the cell row and percentage of cells with the indicated D  
819 localisation in that row; circle area is proportional to the number of cells represented.  
820 Since D is thought to accumulate on the side of a cell facing the neighbour with the  
821 least Ds, the pattern of D polarity in the undenticulate region suggests that there is a  
822 peak of Ds activity in row 10 (see **figure 9** for full model). n = 594 cells from a total of  
823 44 larvae.

824 **Figure 7.** *ovo*-overexpressing clones in normally undenticulate areas of the epidermis.  
825 (A) Clone in the A compartment (cell rows 7, 8, and 9), marked with EGFP and  
826 producing ectopic denticles that point backwards. (B) Clone in the P compartment

827 (cell row -1), ectopic denticles pointing forwards. Note that denticles are produced  
828 somewhat sporadically and that denticle numbers vary per cell. Scale bars: 10µm.

829 **Figure 8.** Analysis of microtubule polarity in larval epidermal cells. (A,B) Rose  
830 diagrams showing the distribution of growing microtubule direction in cells of the (A)  
831 anterior and (B) posterior compartment. EB1 comets are grouped in bins of 4 degrees,  
832 the length of each bin indicating the percentage of comets with a specific orientation.  
833 Comets pointing to the left (135-225°, orange quadrant) grow anteriorly, comets  
834 pointing to the right (315-45°, pink) posteriorly, up (45-135°, blue) are medial, and  
835 down (225-315°, green) are lateral; n is the total number of comets tracked, from the  
836 number of cells/larvae indicated in parenthesis. (C,D) Frequency of microtubules with  
837 either anterior, posterior, medial or lateral orientation in (C) A cells and (D) P cells.  
838 Comets are sorted into four sectors of 90 degrees centred on the anteroposterior and  
839 mediolateral axes. The 95% confidence interval for all comets in each quadrant is  
840 calculated according to Sison and Glaz [59]. (E) Dot plot comparing the orientation of  
841 microtubules within each cell of the A and P compartment. For every cell, the fraction  
842 of comets falling into the anterior quadrant is plotted next to the fraction in the  
843 posterior quadrant, medial next to lateral. Lines connecting the twin values from the  
844 same cell emphasise the high variability between individuals. Mean percentage and  
845 95% confidence interval of the mean for each set of cells are shown. Overlying  
846 numbers display the exiguous difference between means (md) of the anterior versus  
847 posterior and medial versus lateral quadrants, with 95% confidence interval estimated  
848 by recalculating the difference of the means after resampling the data 10,000 times and  
849 finding the 0.025 and 0.975 quantiles of the resulting distribution of values; P-values  
850 were obtained as the frequency of resampled differences of the means that were  
851 greater than the observed.

852 **Figure 9.** Model of Ds activity and planar cell polarity in the larval ventral epidermis.  
853 The strong Ds accumulation on both sides of T3 tendon cells (**figures 3, 4**) suggests  
854 that *ds* expression is high in T3 itself and/or its neighbours. In addition, D::EGFP  
855 clones (**figures 5, 6**) and ectopic denticles (**figure S3A**) show that polarity of row 10  
856 points backwards, away from T3, implying that Ds activity is higher in row 11 than in

857 T3. These two observations combined argue that *ds* expression peaks in row 10, two  
858 cells anterior to the A/P border, with Ds activity also high in T3 and row 11. Graded  
859 *ds* expression forwards and backwards from this peak together with high levels of *ff*  
860 expression in tendon cells determine the landscape of Ds activity, now extended to the  
861 undentificate region. The Ds gradient indicated has not been confirmed, it is a  
862 speculation. Our data suggest, that if there is a pervasive gradient, it will be shallow,  
863 perhaps even more shallow than shown. The differences in Ds activity between each  
864 cell's anterior and posterior sides orient D accumulation; D localises to the side that  
865 has the highest Ds activity and “sees” the lowest Ds activity in its neighbour. D  
866 asymmetrical distribution precisely matches the pattern of cell polarity revealed by  
867 denticles, as demonstrated by direct visualisation of tagged D in the whole segment  
868 and induction of denticles in normally naked cells. Cell 11 is shown with some  
869 ambiguity, because that is what we find (see main text). Blue shading indicates P  
870 compartment cells, grey shading tendons.

871 **Movie 1.** Film of microtubule dynamics in a representative larval A cell. EB1::GFP  
872 comets in a row 7 cell from the right hemisegment imaged for 4 minutes at 5.16s  
873 intervals. Juxtaposed movie shows manual tracing of 200 comet trajectories over the  
874 entire surface of the cell. Anterior is to the left, medial is down. Scale bar: 5µm.

875 **Movie 2.** Film of microtubule dynamics in a representative larval P cell. EB1::GFP  
876 comets in a row -1 cell from the left hemisegment imaged for 4 minutes at 5.16 s  
877 intervals. Juxtaposed movie shows manual tracing of 200 comet trajectories over the  
878 entire surface of the cell. Anterior is to the left, medial is up. Scale bar: 5µm.

**Table 1** Atypical cells: quantitation of predenticle polarities in relation to neighbouring cells, showing the effect of over expressing *ds* in the Tendon cells.

*wild type*

| Anterior neighbour | Predenticle polarity of atypical Row 2 cells |             | Posterior neighbour |
|--------------------|----------------------------------------------|-------------|---------------------|
|                    | Anteriorly                                   | Posteriorly |                     |
| T1 cell            | 0                                            | <b>44*</b>  | Row 3 cell          |
| Row 2 cell         | 0                                            | <b>52*</b>  | Row 3 cell          |

Predenticles of 39 atypical cells from 15 larvae. Fischer's exact test p-value = 1. \*8 predenticles with an unclear position were allocated equally to these groups.

| Anterior neighbour | Predenticle polarity of atypical Row 4 cells |             | Posterior neighbour |
|--------------------|----------------------------------------------|-------------|---------------------|
|                    | Anteriorly                                   | Posteriorly |                     |
| Row 3 cell         | <b>207</b>                                   | 0           | T2 cell             |
| Row 3 cell         | 105*                                         | <b>45</b>   | Row 4 cell          |

Predenticles of 74 atypical cells from 21 larvae. Fischer's exact test p-value <  $2.2^{-16}$ . \*18 predenticles with an unclear position were arbitrarily added to this class, in favour of the null hypothesis.

*sr.Gal4 UAS.EctoDs*

| Anterior neighbour | Predenticle polarity of atypical Row 2 cells |             | Posterior neighbour |
|--------------------|----------------------------------------------|-------------|---------------------|
|                    | Anteriorly                                   | Posteriorly |                     |
| T1 cell            | <b>61</b>                                    | 8*          | Row 3 cell          |
| Row 2 cell         | 7**                                          | <b>49</b>   | Row 3 cell          |

Predenticles of 42 atypical cells from 28 larvae. Fischer's exact test p-value <  $2.2^{-16}$ . \*6 and \*\*3 predenticles with an unclear position were arbitrarily added to these classes.

| Anterior neighbour | Predenticle polarity of atypical Row 4 cells |             | Posterior neighbour |
|--------------------|----------------------------------------------|-------------|---------------------|
|                    | Anteriorly                                   | Posteriorly |                     |
| Row 3 cell         | 5                                            | <b>119*</b> | T2 cell             |
| Row 3 cell         | 0                                            | <b>99*</b>  | Row 4 cell          |

Predenticles of 40 atypical cells from 20 larvae. Fischer's exact test p-value = 0.068. \*14 predenticles with an unclear position were allocated equally to these groups.

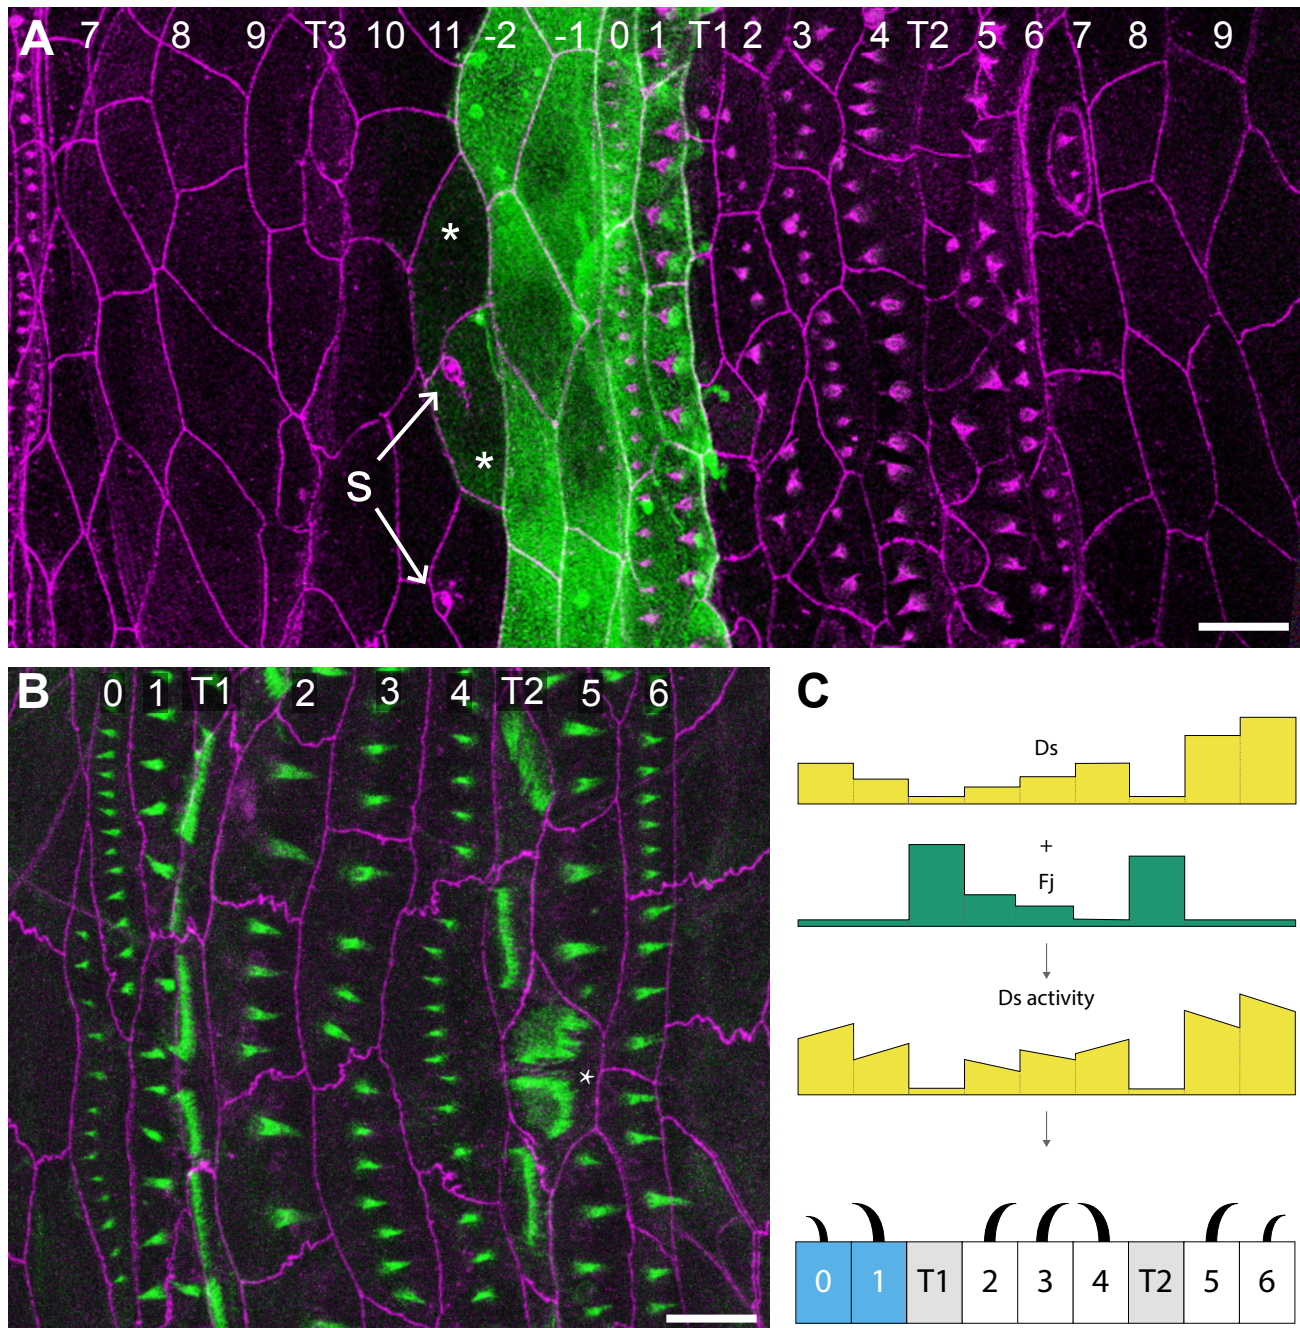

Pietra et al. Figure 1



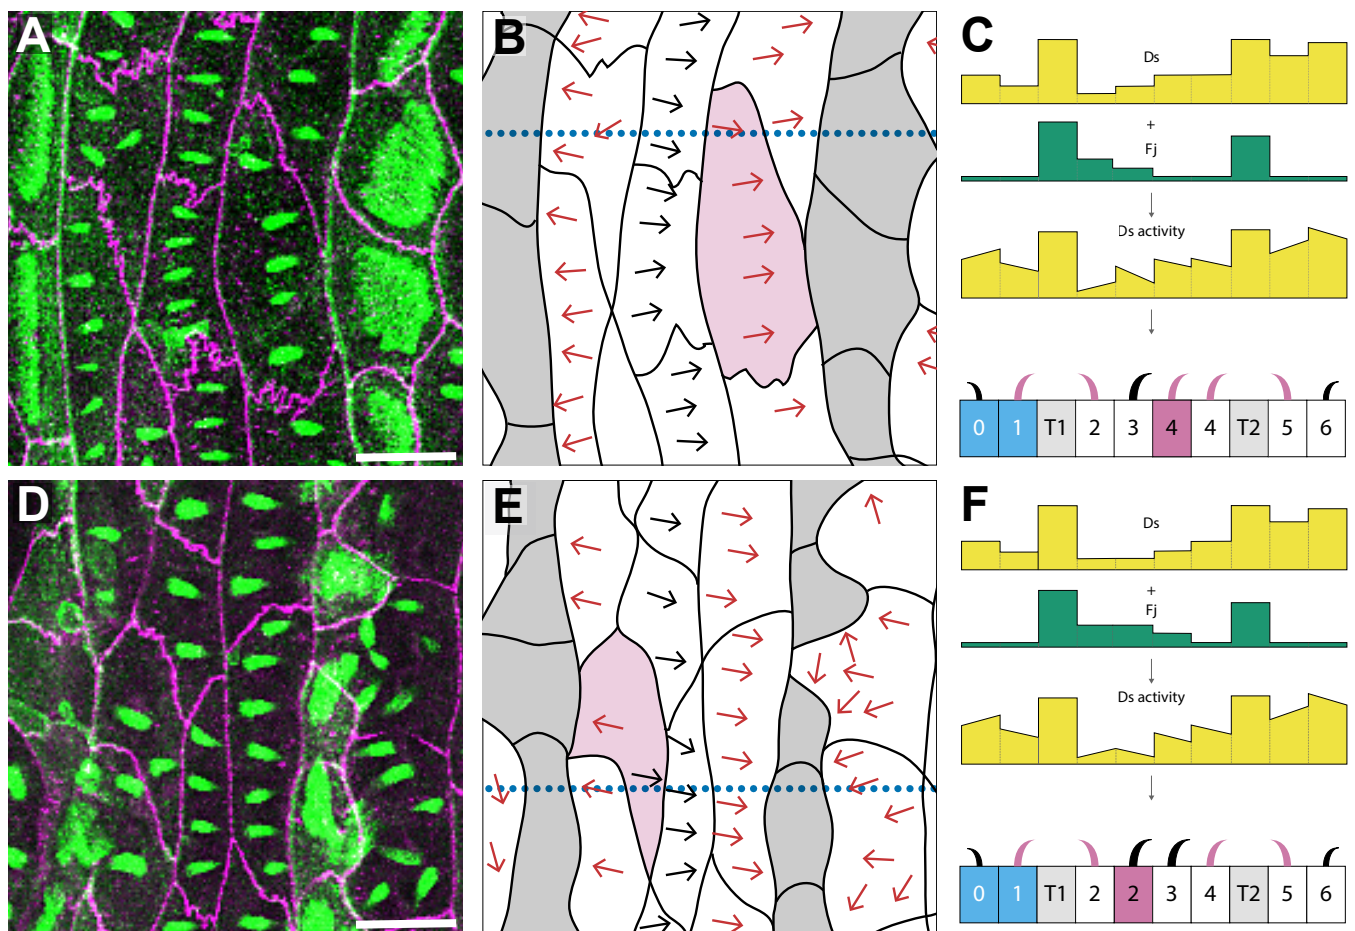

Pietra et al. Figure 2

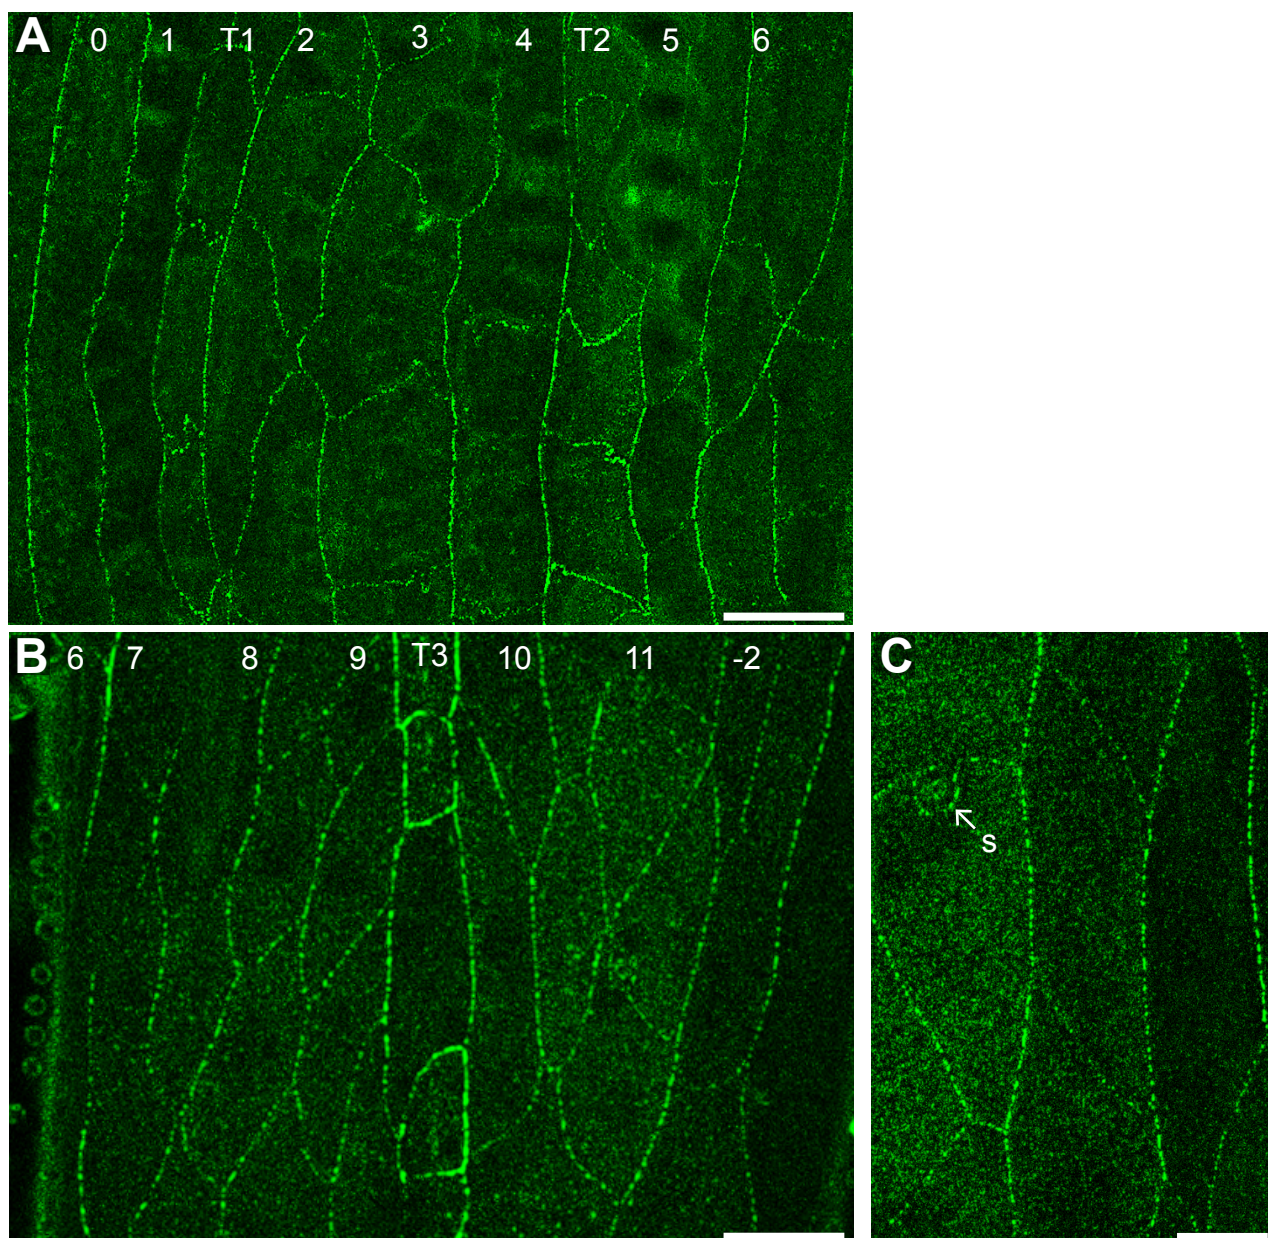

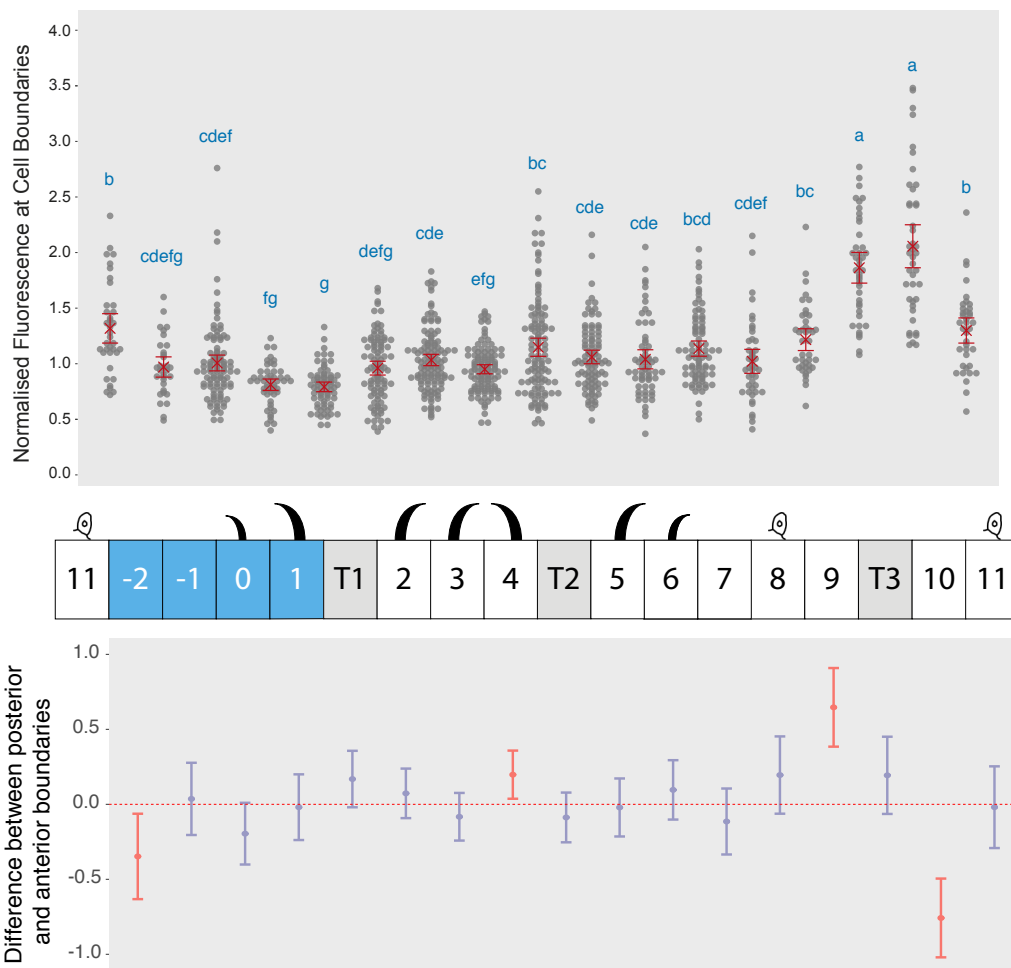

Pietra et al. Figure 4

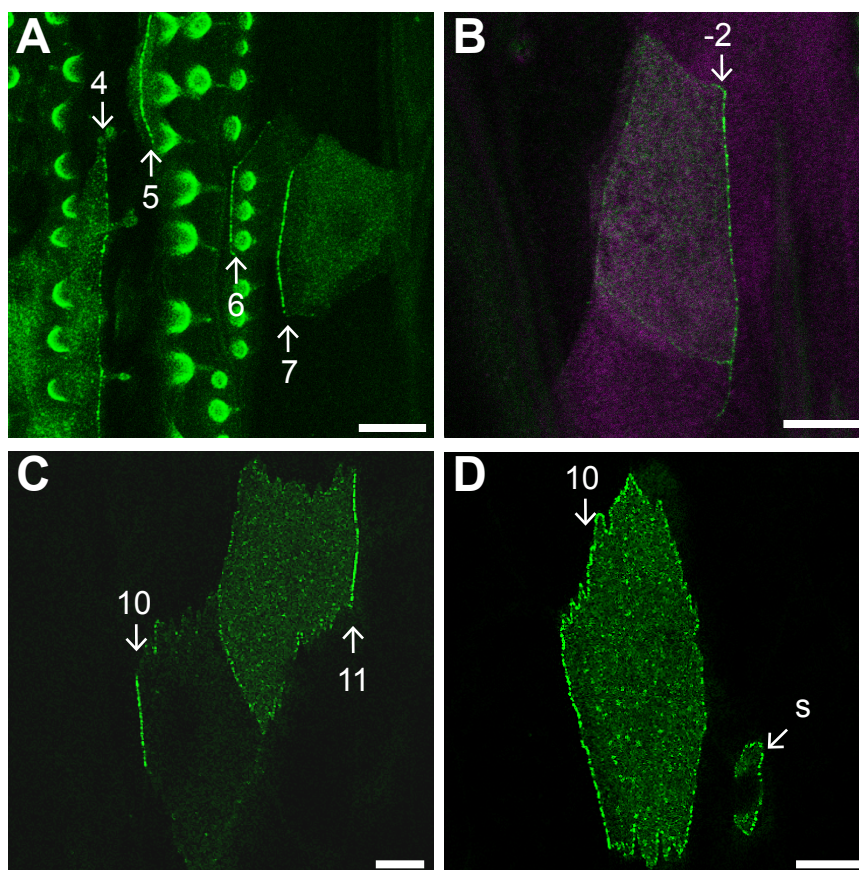

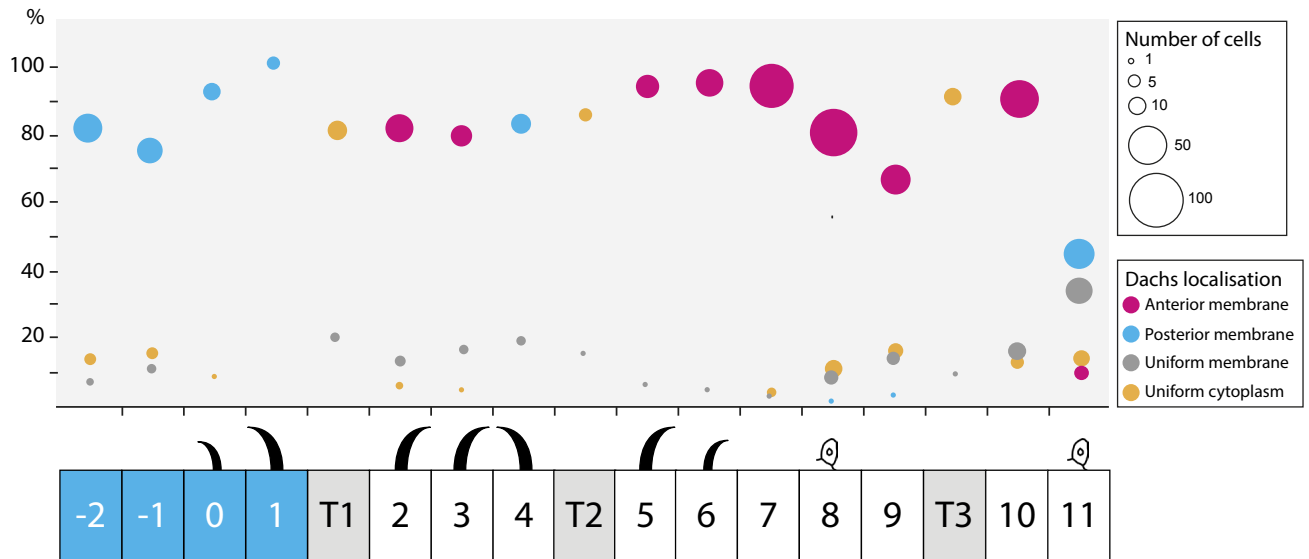

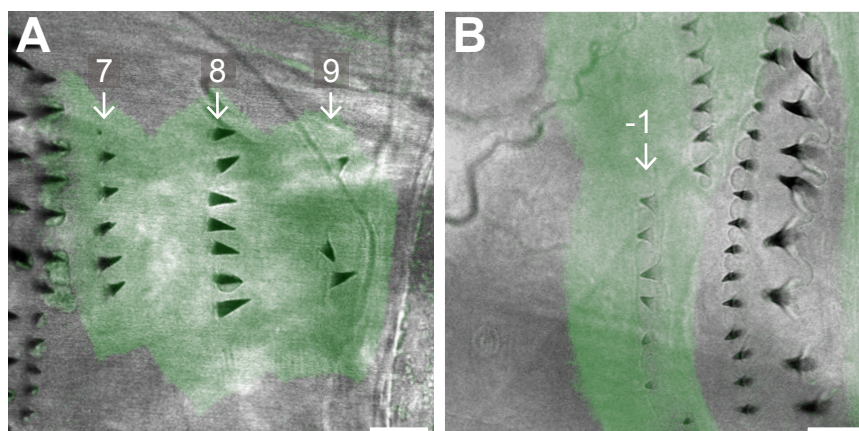

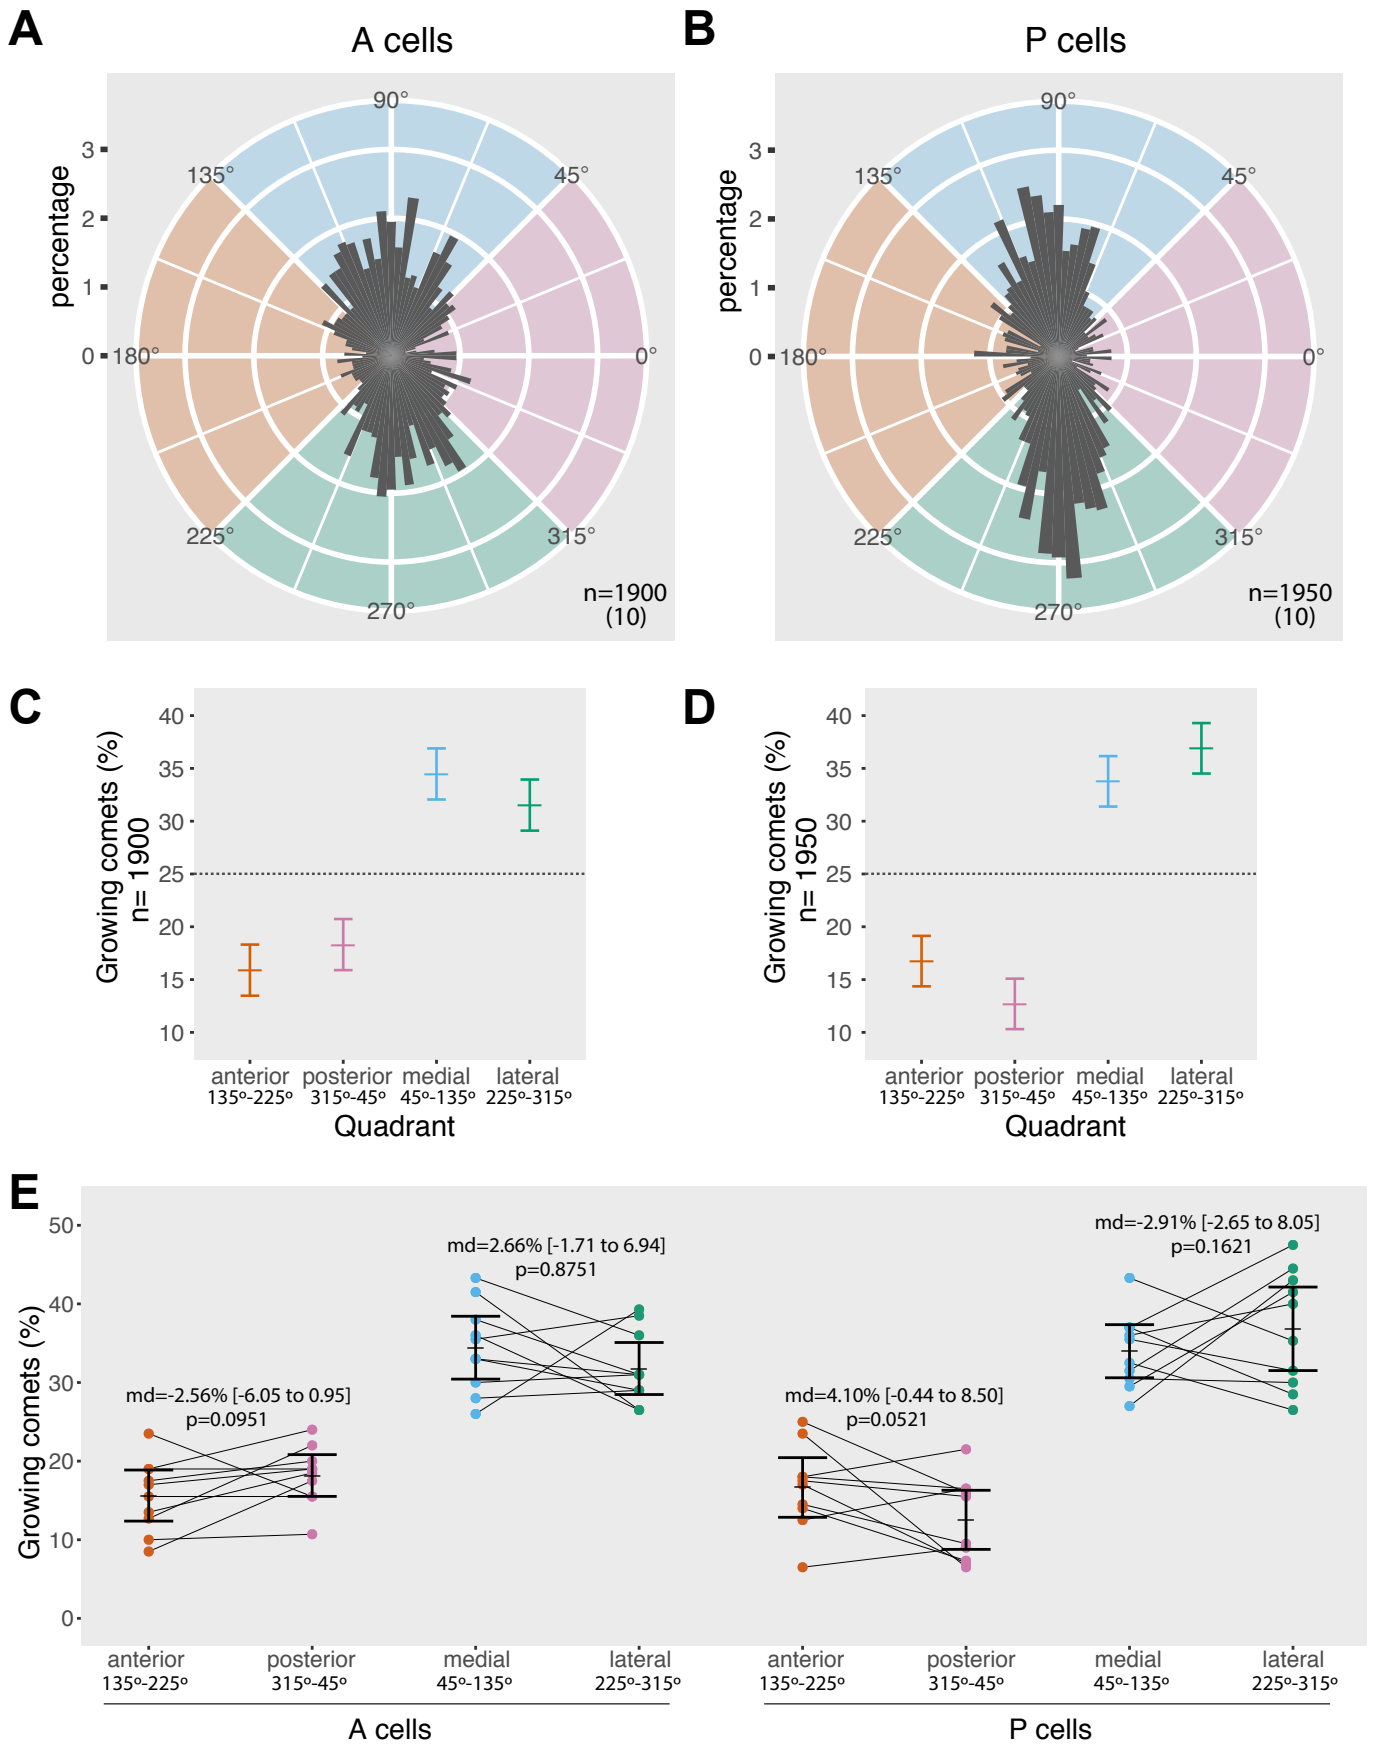

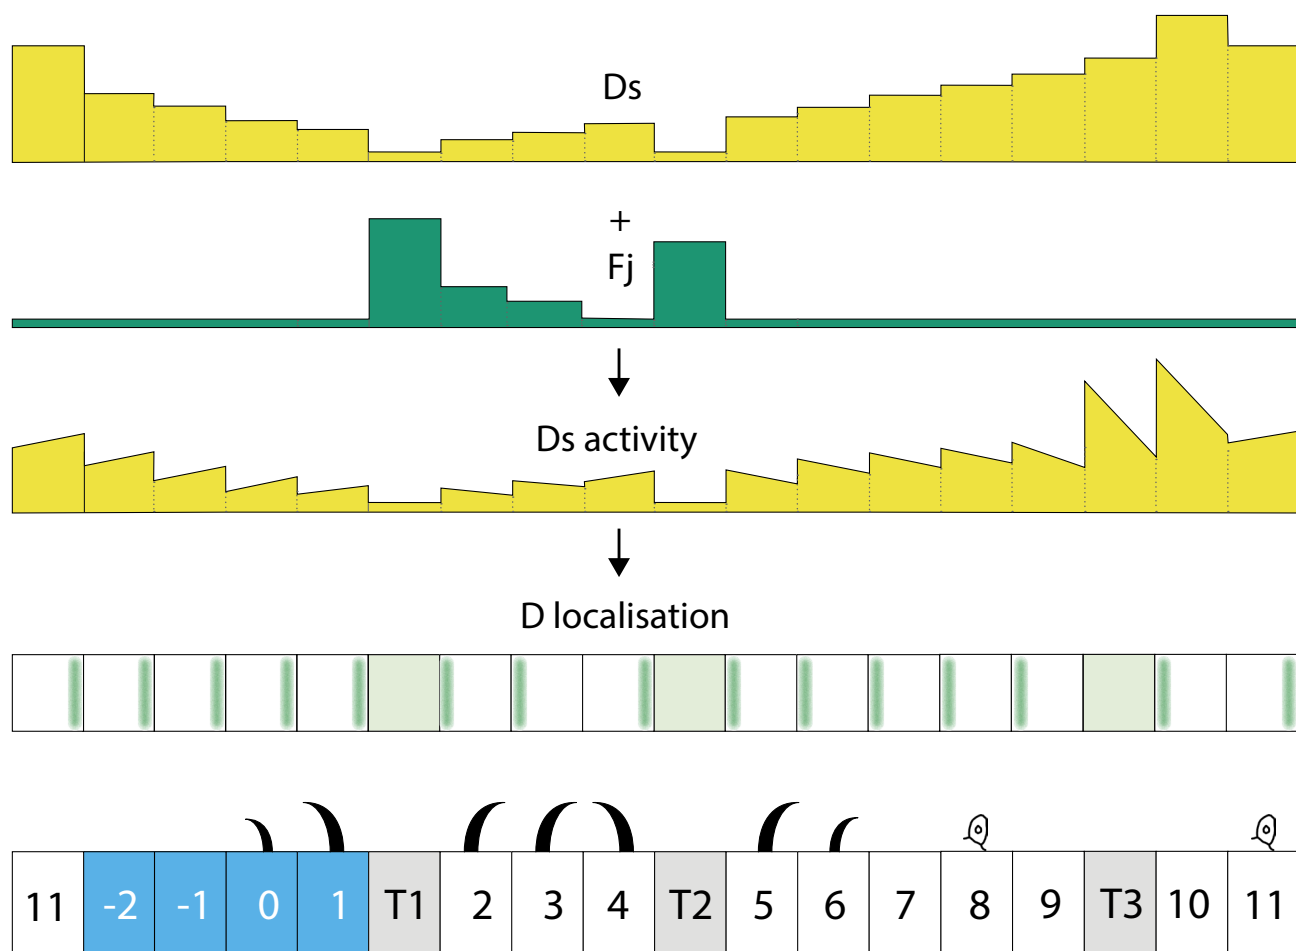



## SUPPLEMENTARY FIGURE LEGENDS

**Figure S1.** Quantitation of Ds levels at cellular interfaces in polarity modified larvae. (A) Dot plot, diagram of denticle polarity, and (B) pairwise comparisons are presented as in **figure 4**. Data are pooled from 3 images of larvae where overexpression of untagged Ds is specifically driven in tendons and changes the polarity of adjacent denticle cells (see **figure 2**). Ds distribution in (C) wild type (a detail from **figure 3A**) and (D) polarity modified larvae (*sr.Gal4 UAS.ectoDs*) is clearly different, reflecting the predicted changes in the landscape of Ds activity. For example in (D), more untagged Ds in T1 attracts more Ft molecules in row 2 cells to the T1/2 boundary, consequently displacing the row 2 endogenous, tagged Ds to the 2/3 boundary and raising fluorescence on that interface. The same effect emanating anteriorly from T2 raises Ds fluorescence at the 3/4 boundary. As expected, Ds amounts on the 2/3 and 3/4 boundaries are significantly higher than on the surrounding boundaries, arguing that the method is capable of detecting cellular interfaces with raised Ds activity. Attempts to relate observed polarity of a cell with the localisation of Ds at its membranes are compromised because we cannot determine how much Ds each of the two abutting cells is contributing to their joint membrane. It is interesting to note that overexpressing ectoDs in the tendon cells has no significant effect on the amount of tagged Ds in 1/T1 or T2/5 boundaries. We think that is due to the several cells anterior to row 1 and the several cells posterior to row 6 dampening the effects. Scale bars: 20µm.

**Figure S2.** D localisation on limited parts of the plasma membrane. (A) Row 10 and 11 cells from a wildtype larva expressing *d::EGFP*, with cell outlines marked in magenta by *DE-cad::tomato* (see **figure 5C** for single EGFP channel). D is on just one side of each cell, but its localisation at the plasma membrane is not continuous: the row 10 cell accumulates D on the anterior membrane only where it confronts a T3 cell, not where it faces other row 10 cells; the row 11 cell has D localised at its posterior face, but only where it contacts row -2 cells. Scale bar: 10µm.

**Figure S3.** Unusual *ovo*-expressing clones with ambiguous polarity in row 11 cells. (A,B) Clones marked with EGFP and producing ectopic denticles in rows 10 and 11. *DE-cad::tomato* (magenta) labels cell boundaries and denticles, which in this area can be tenuous

and hard to discern. (**A',B'**) Schemes of cell outlines and denticle orientation; denticles with uncharacteristic polarity are highlighted in red. (**A,A'**) Denticles pointing in opposite directions in two contiguous row 11 cells; all denticles in the neighbouring row 10 cells, point backwards. (**B,B'**) Denticles pointing in mixed directions within a single row 11 cell. Scale bars: 10 $\mu$ m.

**Figure S4.** Local polarity biases in microtubule growth. P values of chi-squared tests between numbers of comets whose orientation falls in opposite 22.5 degree sectors. Tables display the number of comets per sector and p values for larval and pupal sets of A and P cells. Sectors centred on the anteroposterior axis are highlighted in green.

**Figure S5.** Analysis of microtubule polarity in cells of the pupal abdomen, based on raw data kindly provided by the Axelrod group. (**A-E**) Rose diagrams of microtubule growth distribution, frequencies of comet orientation, and dot plot of microtubule direction in individual cells are presented as in **figure 8**. (**A,C,E**) Anterior pupal cells, (**B,D,E**) posterior pupal cells. n indicates total number of comets analysed, from the amount of pupae specified in parenthesis. Unlike ours, the data acquired by Axelrod's group contain no information about which hemisegment they were sampled from; comet orientation is still classified as medial and lateral to facilitate comparison with our results, however these categories should be considered with caution. Note that, in contrast with larval data where differences between the frequencies of comets in opposite quadrants are very weak (**figure 8C,D**), in pupae there are significant biases in the proportion of anteroposteriorly and mediolaterally growing microtubules (see non-overlapping confidence intervals in **C** and **D**).

**Figure S6.** Maximum likelihood best models of microtubule angular distributions. Using a maximum likelihood approach [34] we plot the angular distribution of all growing microtubules and the best fit is to bimodal distributions with two peaks near 180 degrees apart in the mediolateral axis. The distribution densities are shown in blue (darker blue representing the anterior and posterior 90 degree quadrants). A circular histogram (bin size 22.5 degree) of the angle data is at the centre of each plot in grey. The mean vector is shown in red and the two mean angles are shown with discontinuous arrows. The mean values ( $\theta$ ), concentration parameters ( $\kappa$ ), proportional size of the first distribution ( $\lambda$ ), mean vector angle ( $\bar{\theta}$ ) and dispersion ( $\bar{R}$ ) are shown below each plot. A deviation of 10 degrees in one of

the peaks of the distribution from the true mediolateral axis is enough to create a difference in the density area of the anterior and posterior quadrants. In both larval and pupal sets of A cells the area of the posterior quadrant density closest to the deviated peak is slightly bigger (red arrowhead) than the anterior one (green arrowhead). In both larval and pupal sets of P cells the area of the anterior quadrant is slightly bigger (red arrowhead) than the posterior one (green arrowhead).

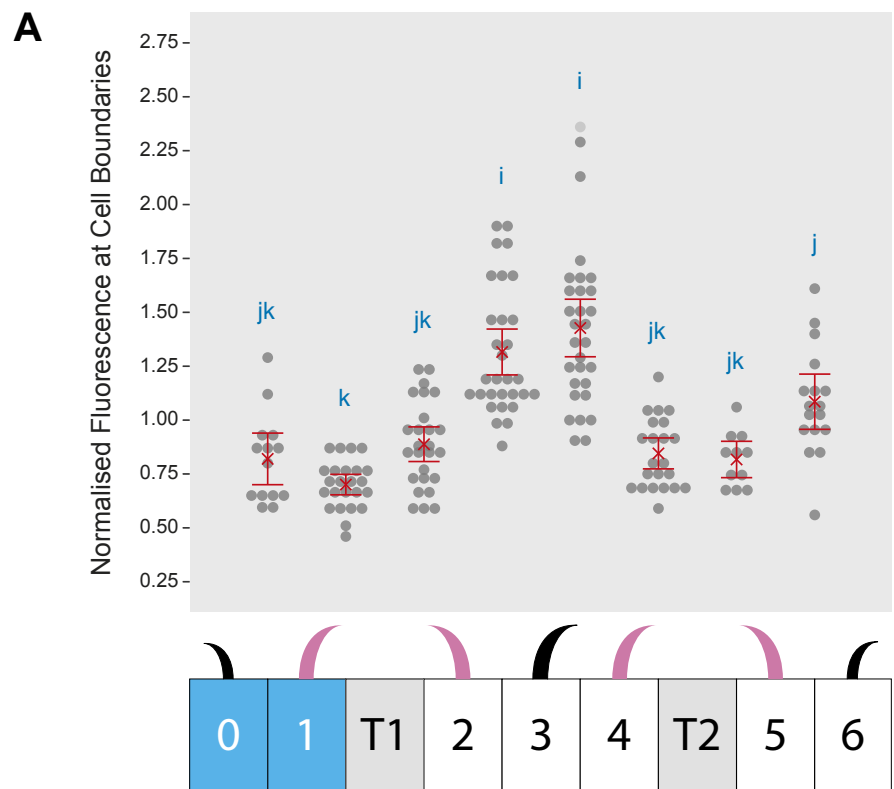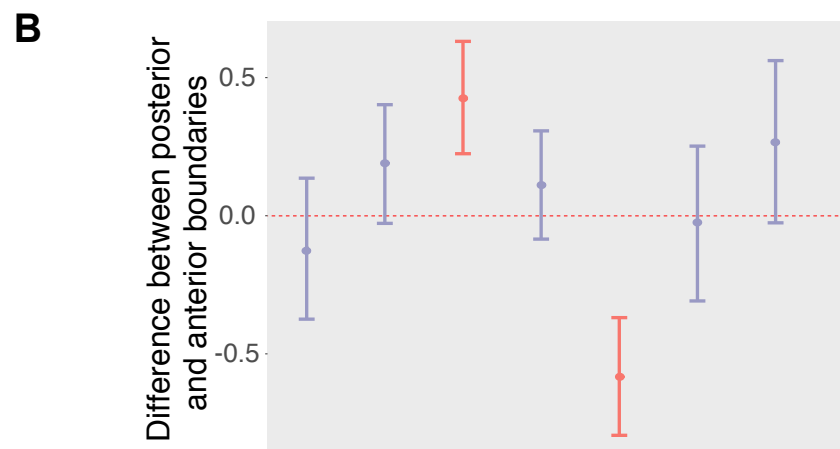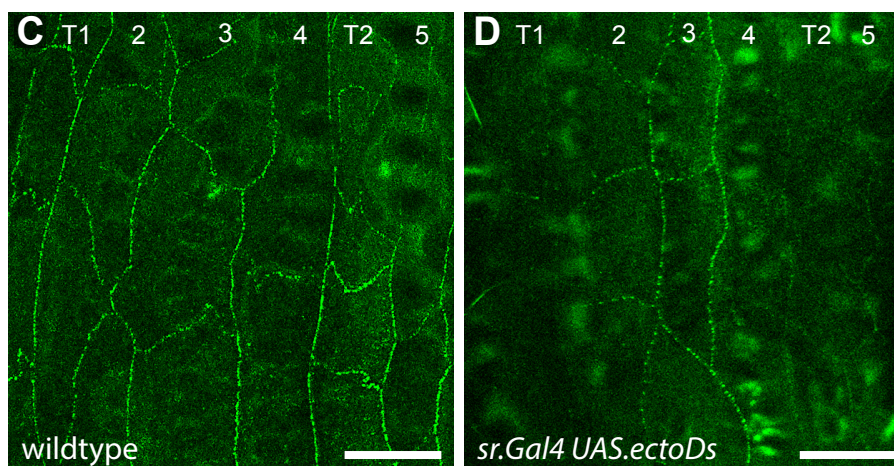

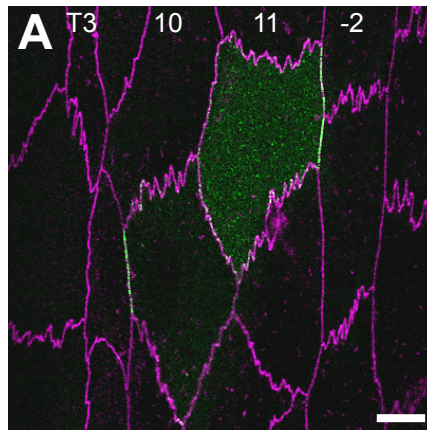

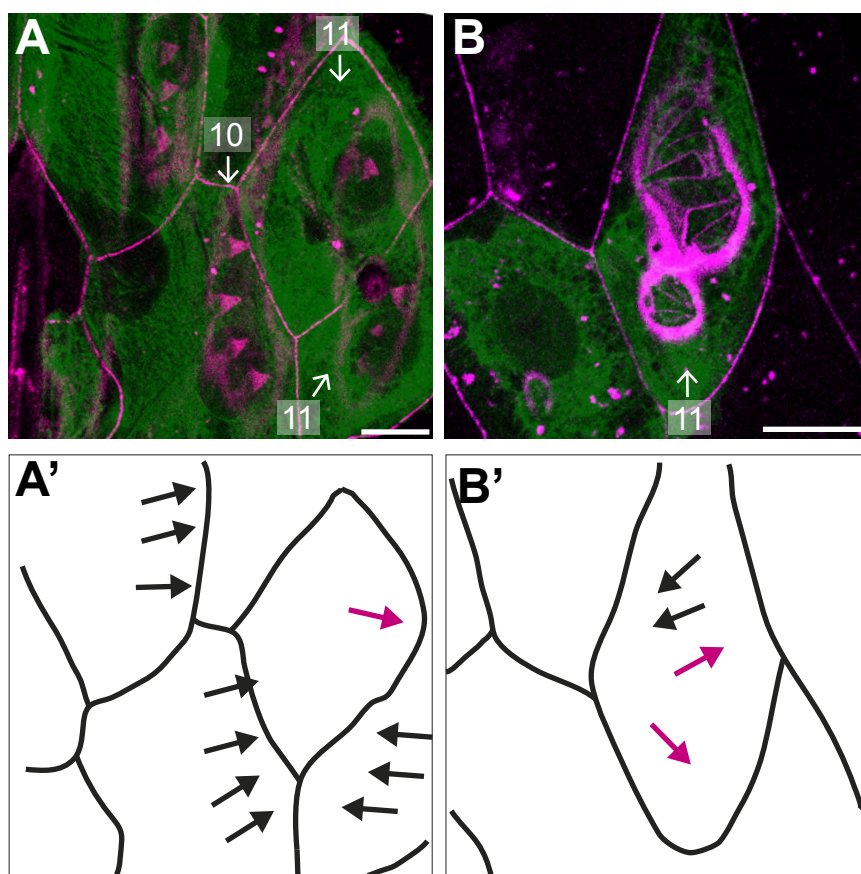

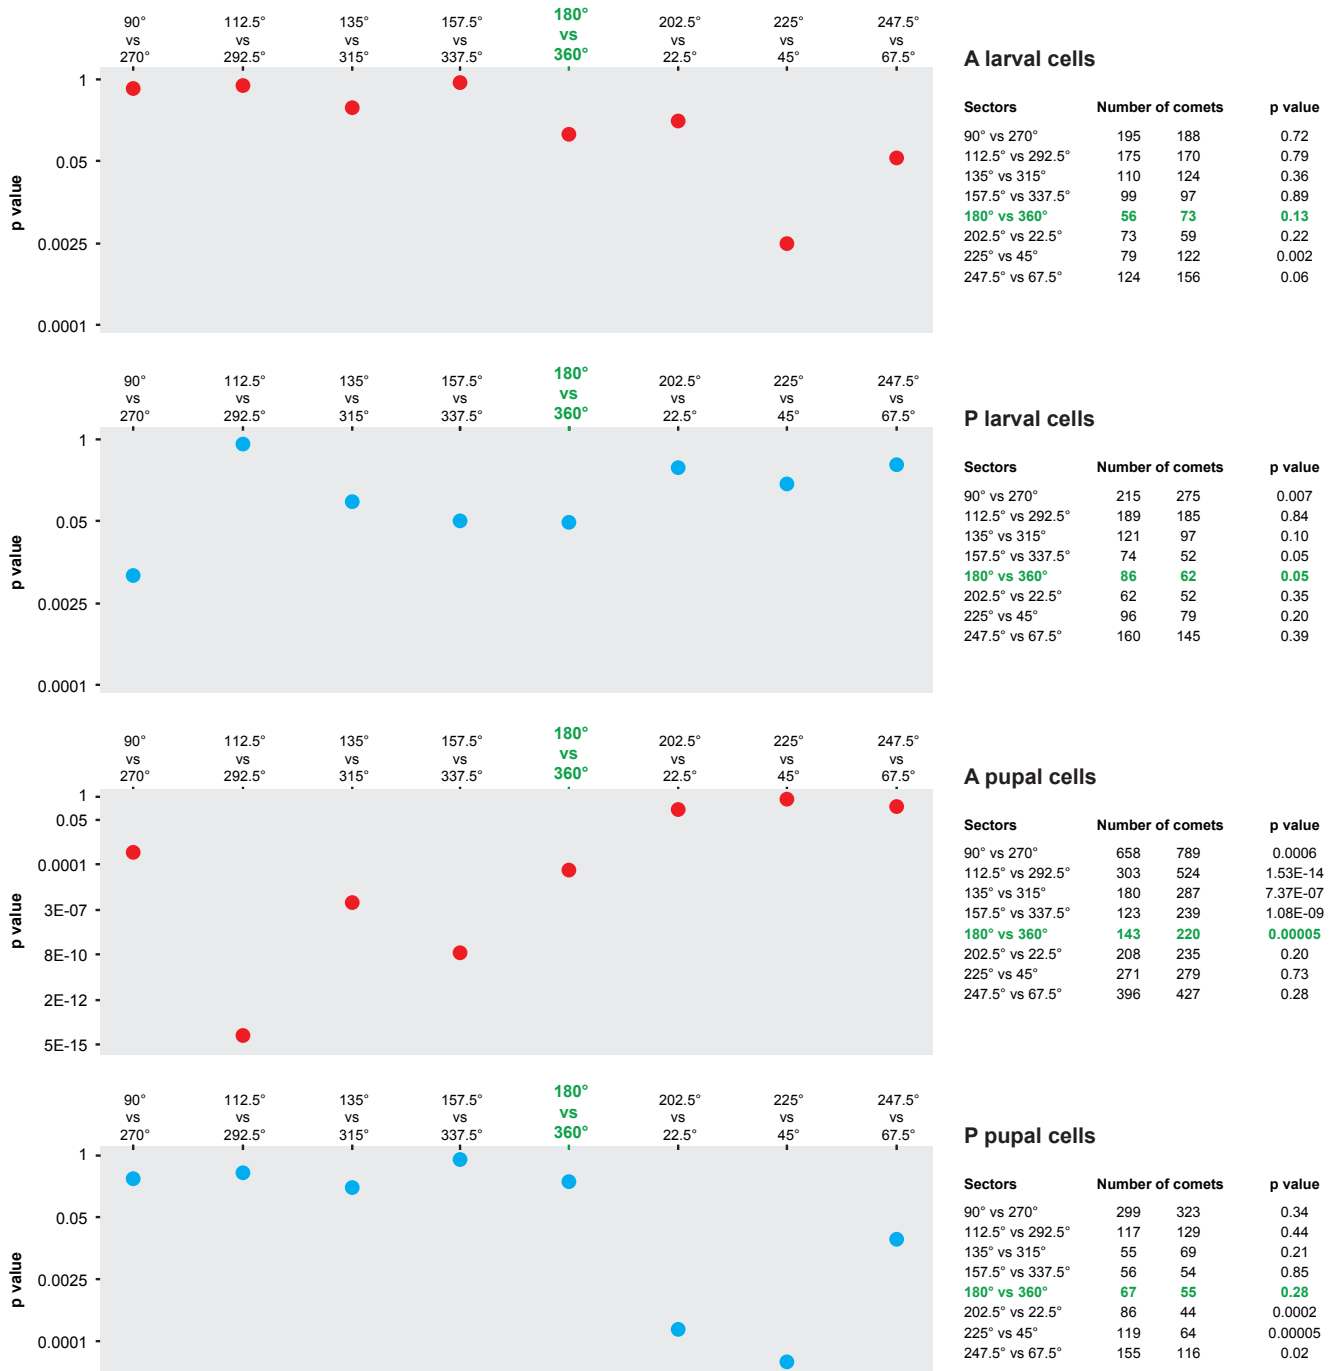

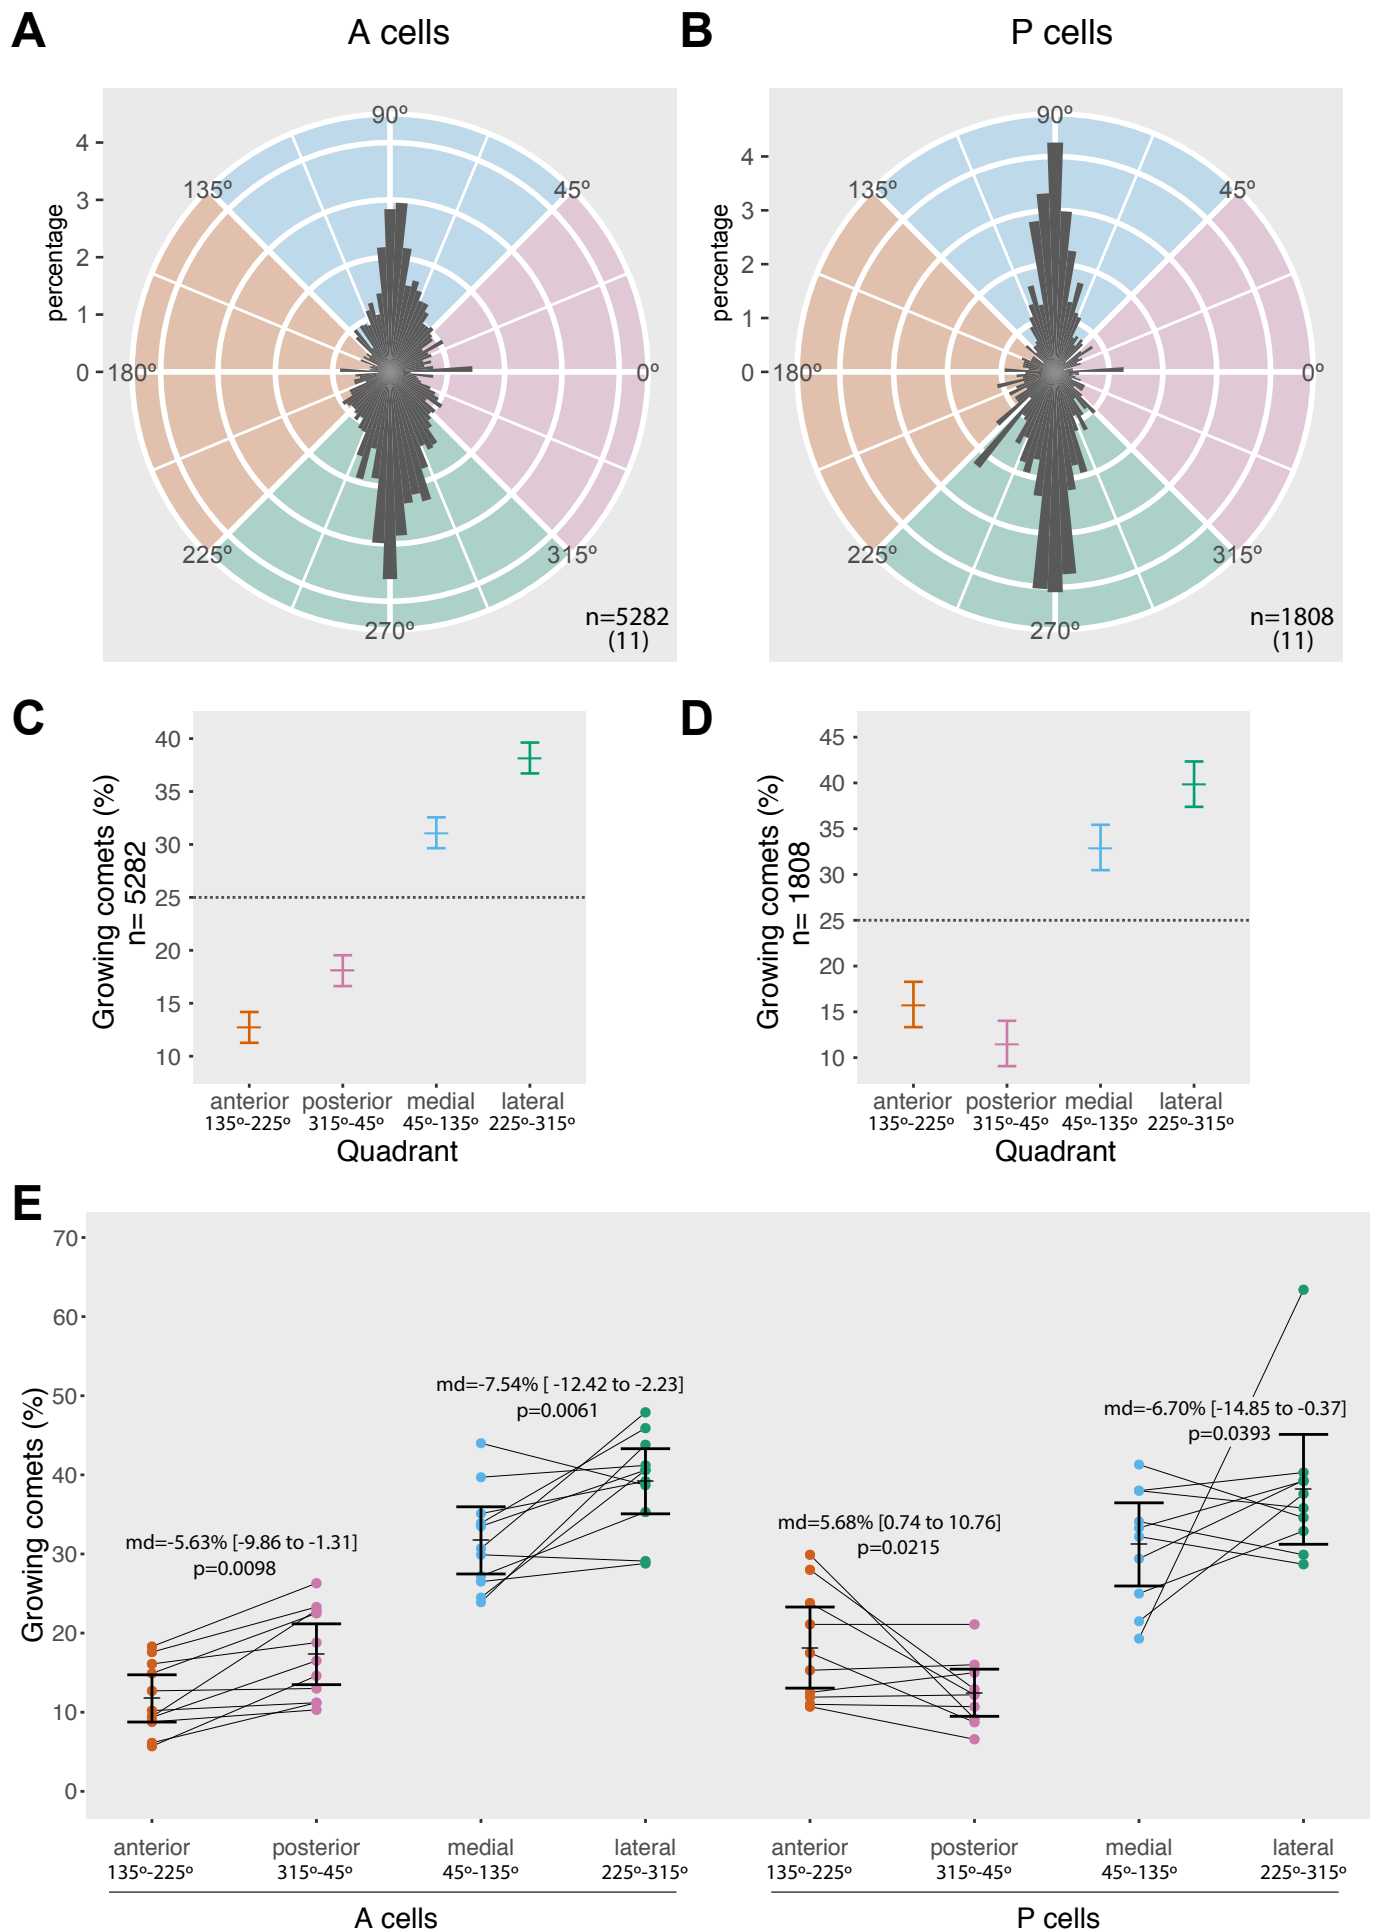



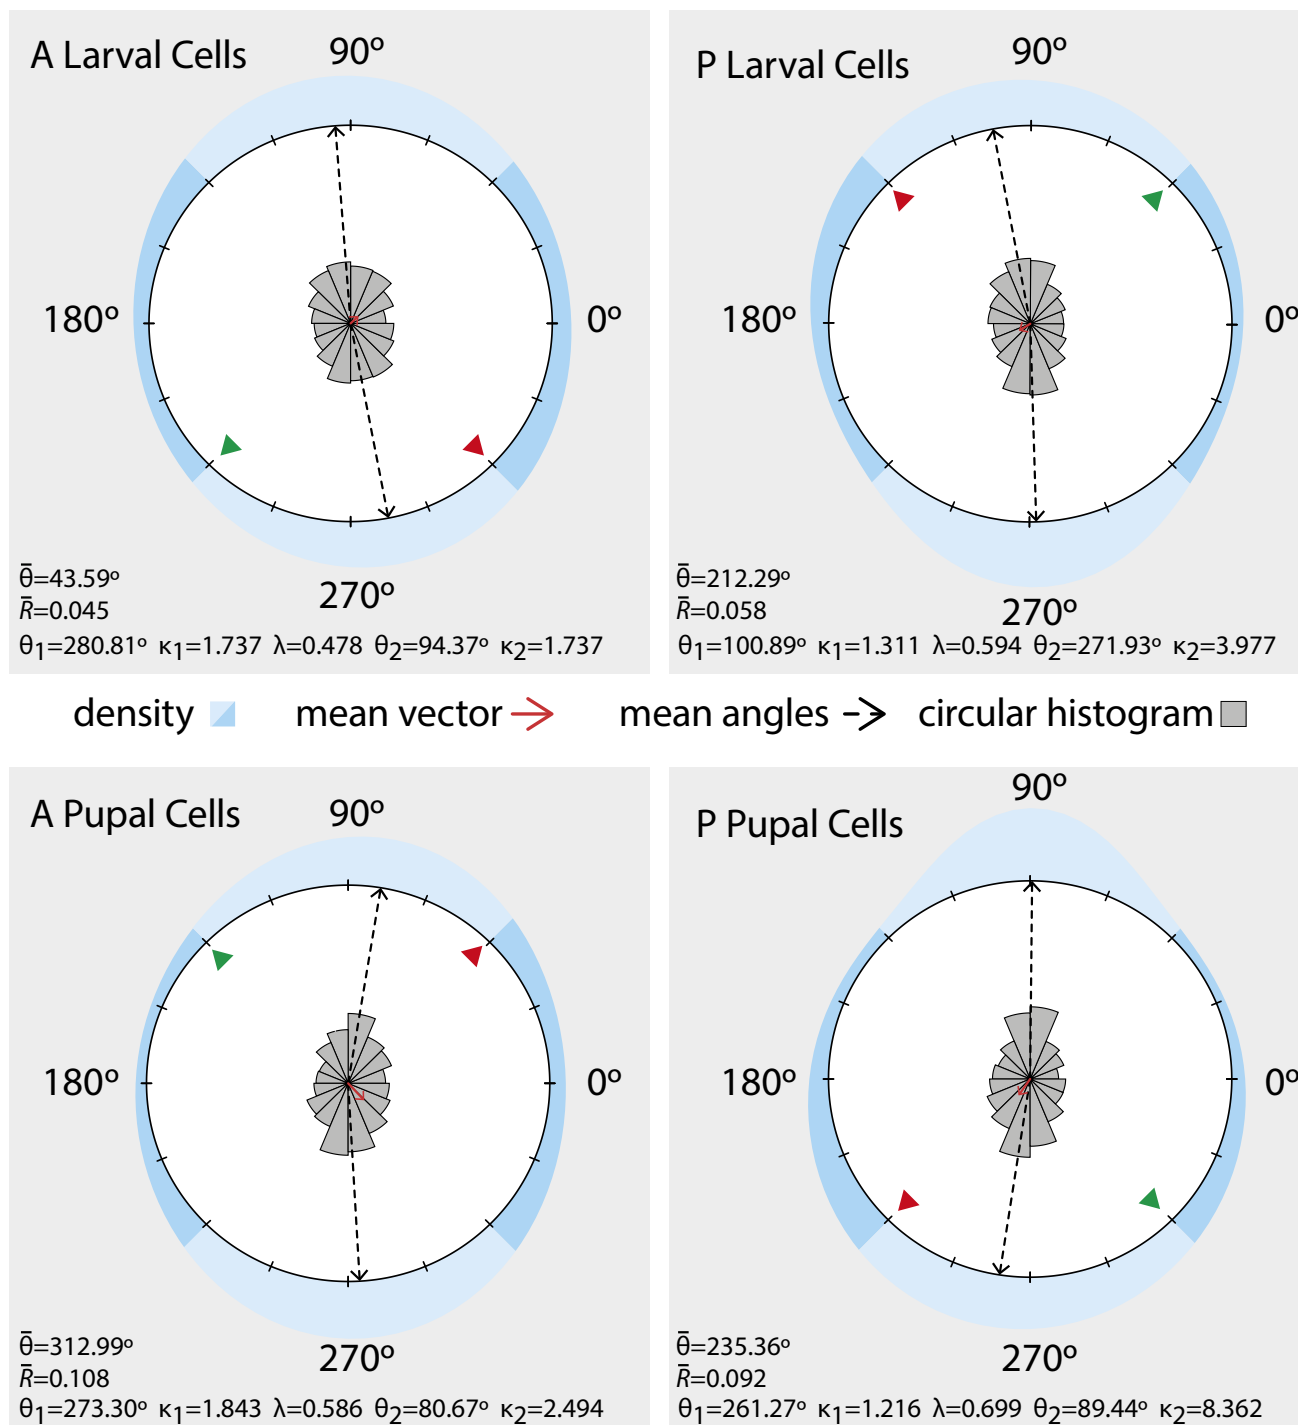

Source: https://www.biorxiv.org/content/10.1101/2020.02.21.959213v3.full.pdf
